# Supplementary material for: Water mediated, environmentally friendly, step-wise, tandem & one-pot syntheses of 2-(1H-benzo[d]imidazole-2-yl)-N-arylbenzamides
Source: Royal Society of Chemistry journal article supplement (doi:10.1039/c3ra44423f), 2013-11-27
Supplement: c3ra44423f.pdf [file c3ra44423f.pdf]

## Electronic Supplementary Information

### Water mediated, environmentally friendly, step-wise, tandem & one-pot syntheses of 2-(1H-benzo[d]imidazole-2-yl)-N-arylbenzamides.

Yervalu Dathu Reddy<sup>a\*</sup>, Chittireddy Venkata Ramana Reddy<sup>a</sup> and Pramod Kumar Dubey<sup>a</sup>

*Department of Chemistry,*

*Jawaharlal Nehru Technological University Hyderabad College of Engineering,*

*Kukatpally, Hyderabad (A.P), India - 500 085.*

*E-mail ID: dathureddyjntuh@gmail.com*

### Contents:

1. Scanned copies of NMR spectra of all compounds
2. Tables (3, 4, 5 & 6)

### 1. Scanned copies of NMR spectra of all compounds

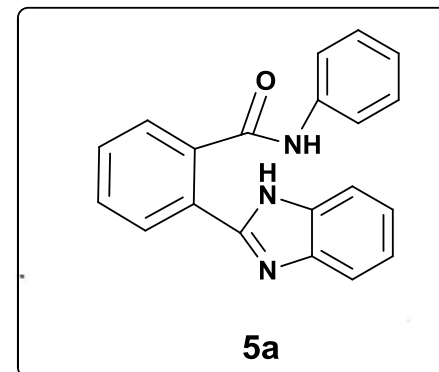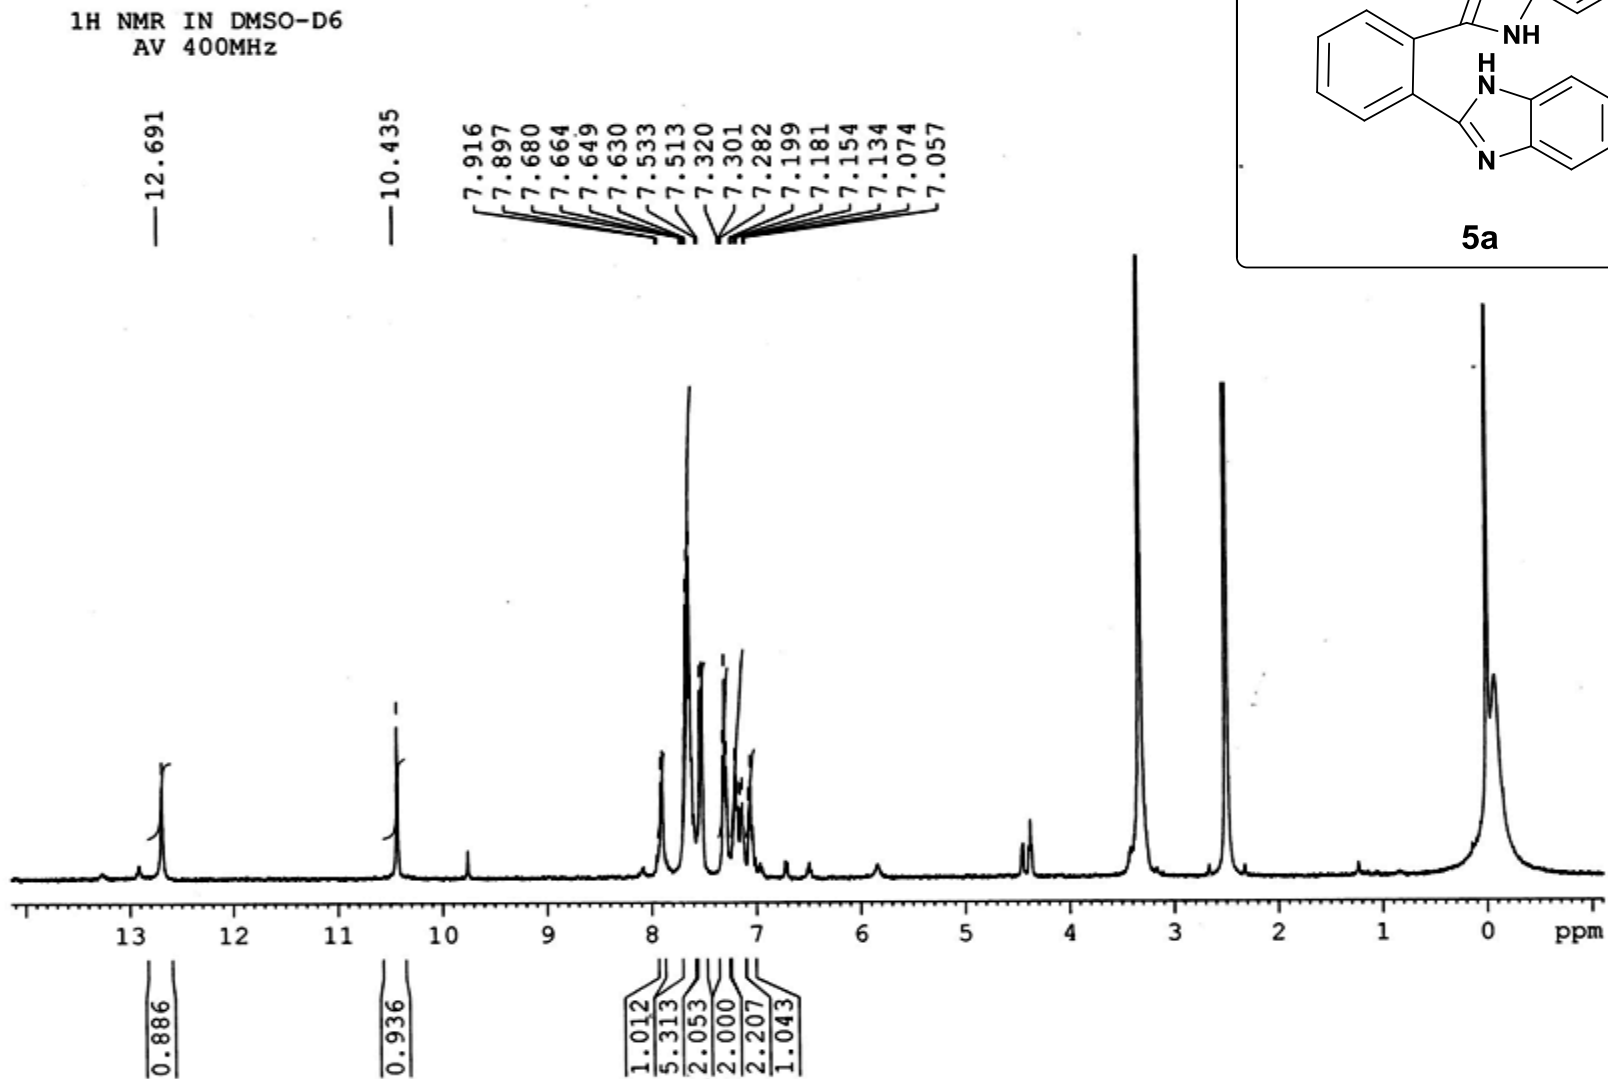

**<sup>13</sup>C NMR IN DMSO-D6  
AV 400MHz**

167.658  
151.091  
150.926  
138.703  
137.657  
135.689  
133.203  
130.749  
130.576  
129.068  
129.038  
128.963  
128.523  
127.314  
123.255  
121.864  
120.299  
115.360

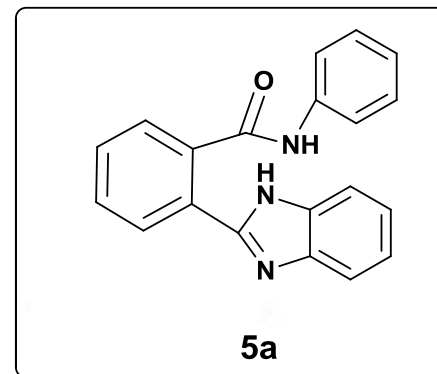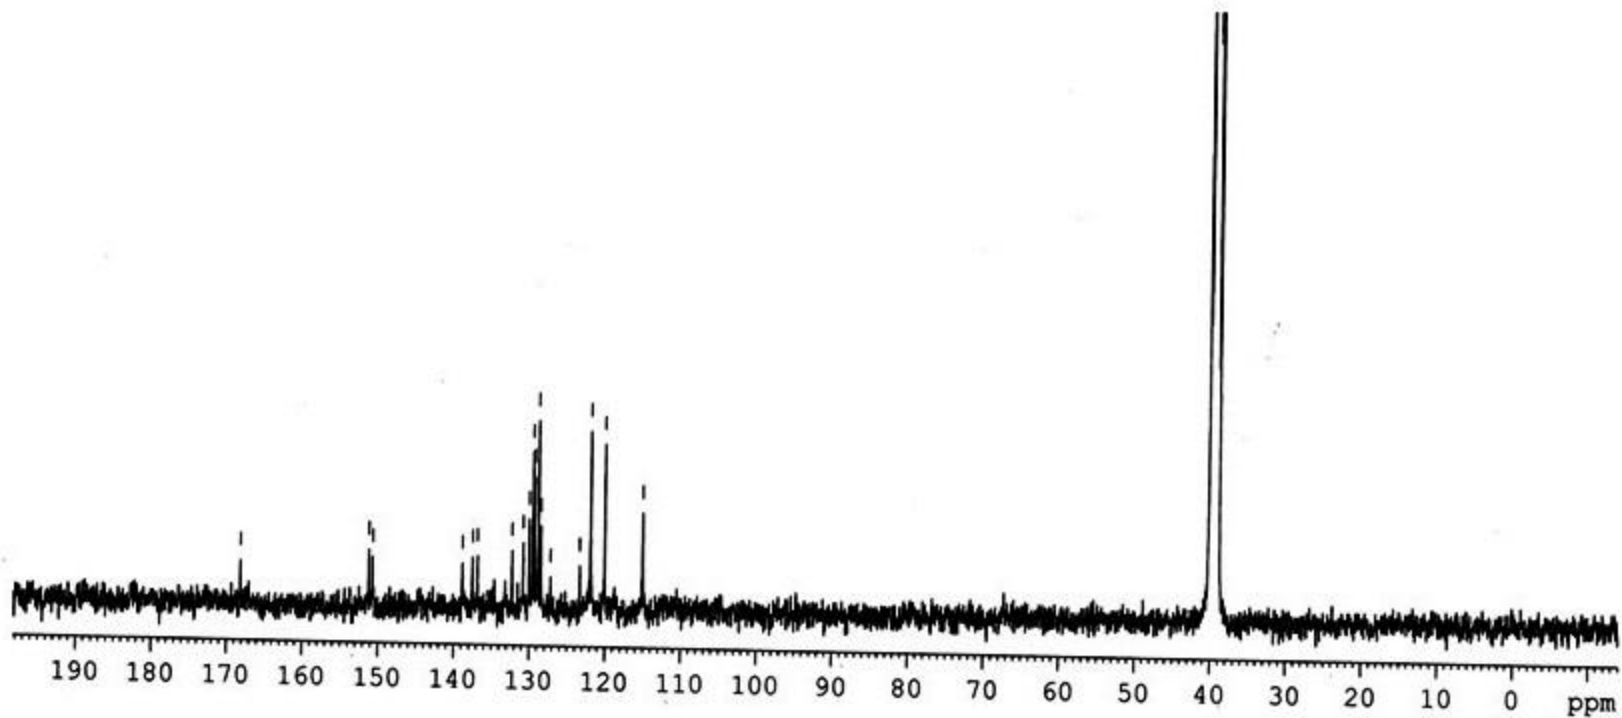

<sup>1</sup>H NMR IN DMSO-D<sub>6</sub>  
AV 400MHz

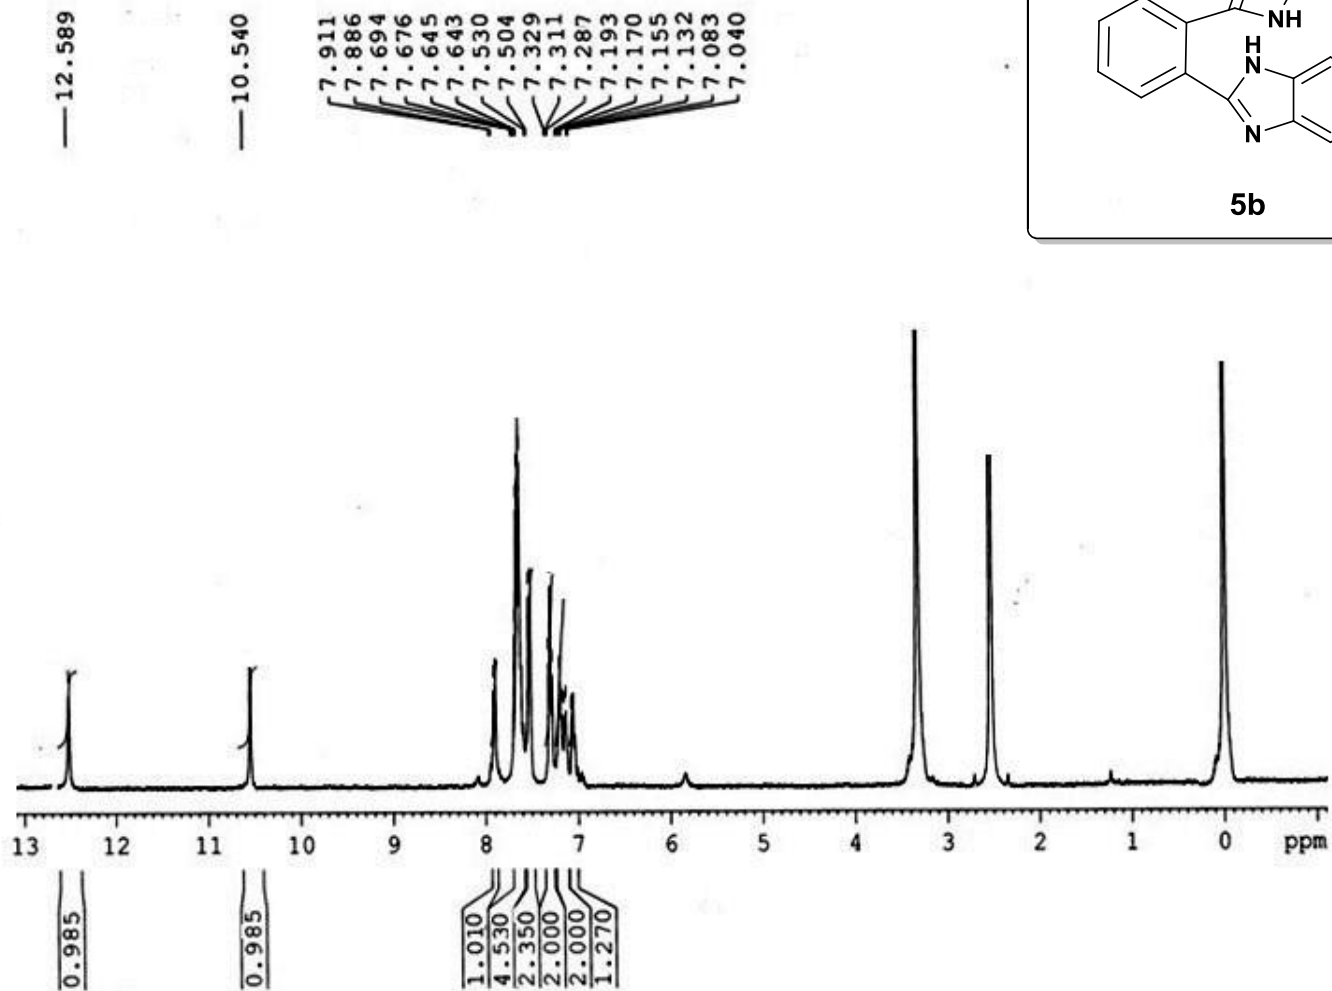

<sup>13</sup>C NMR IN DMSO-D6  
AV 400MHz

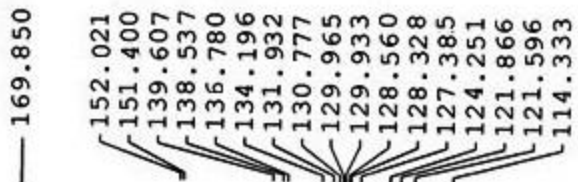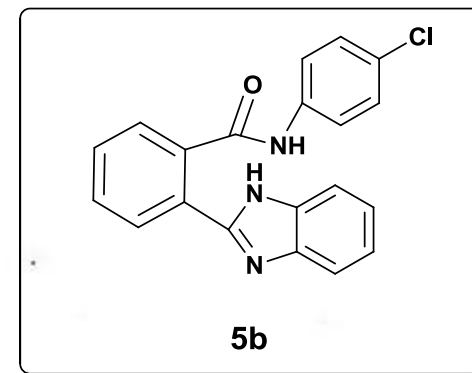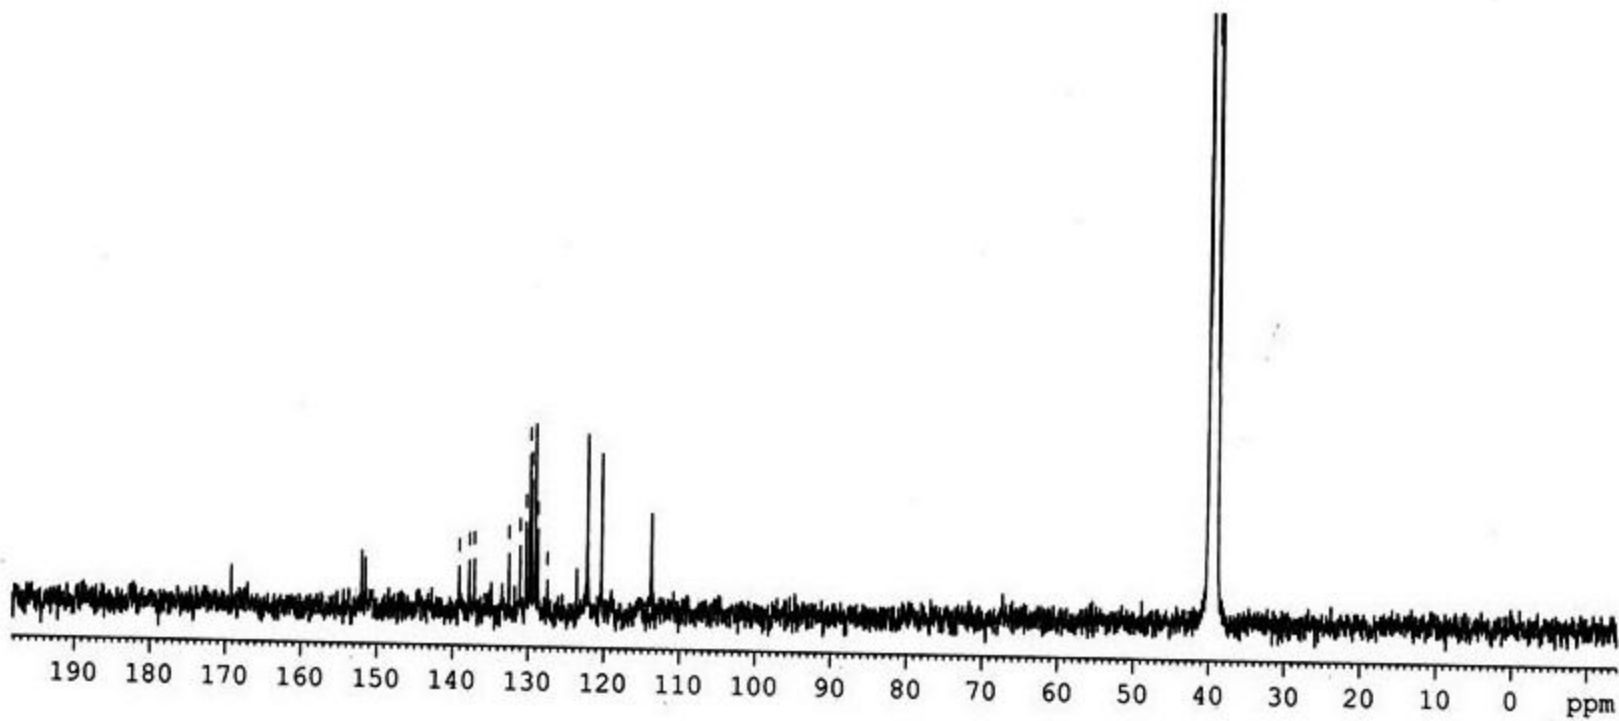

**<sup>1</sup>H NMR IN DMSO-D<sub>6</sub>**  
AV 400MHz

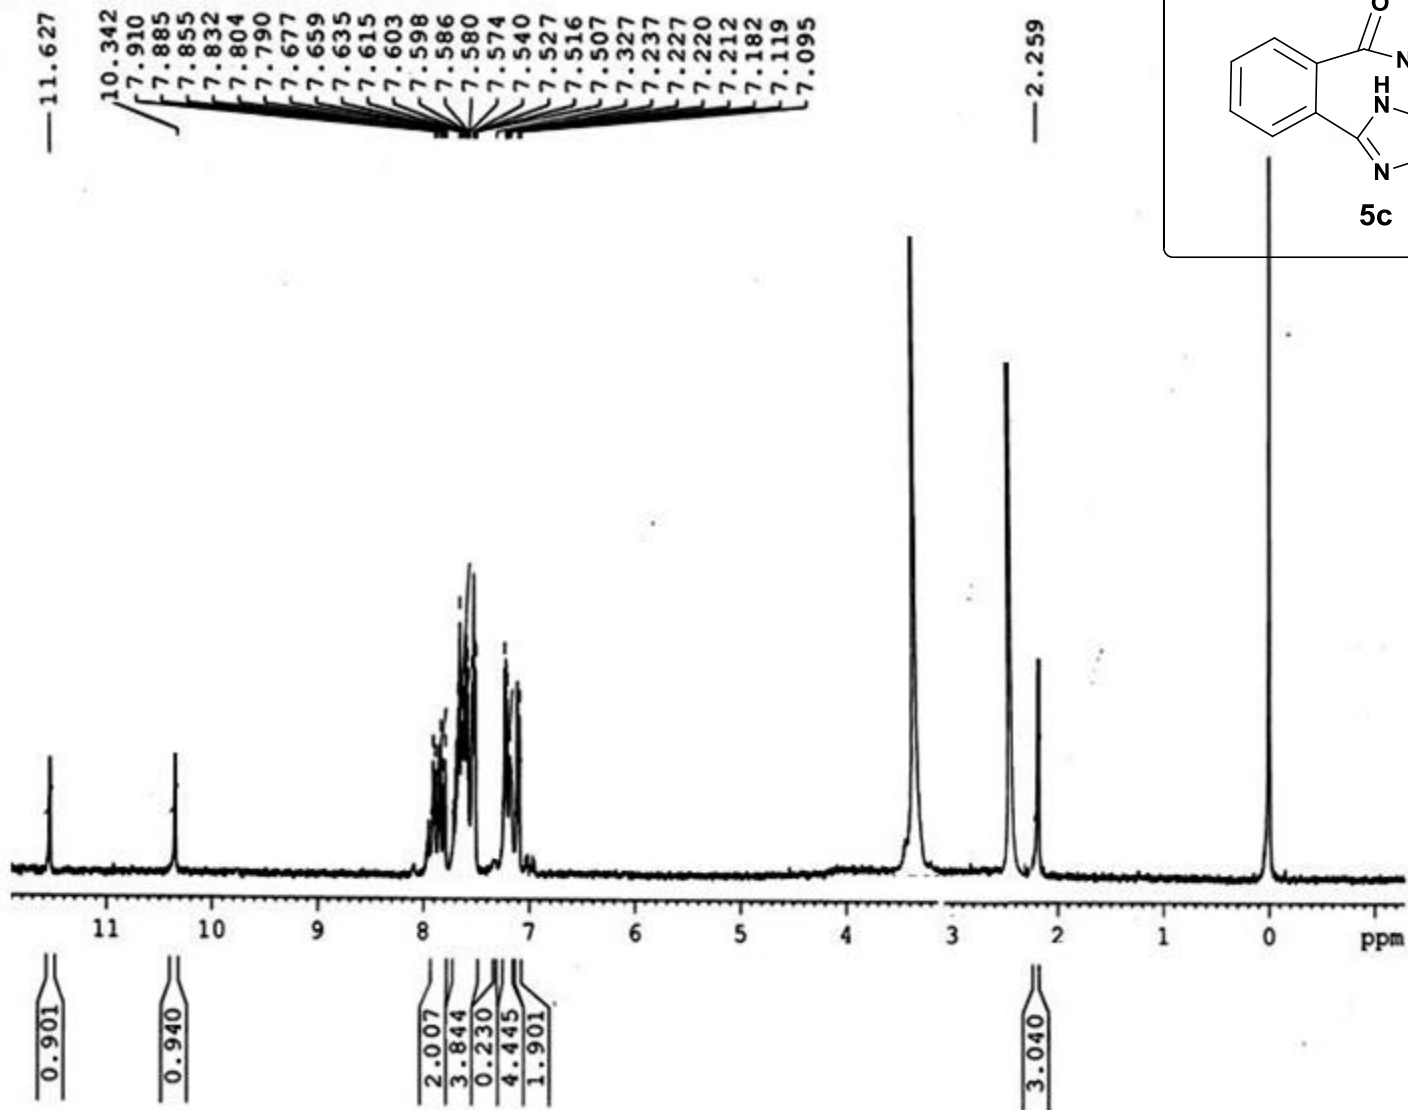

**<sup>13</sup>C NMR IN DMSO-D6  
AV 400MHz**

168.657  
151.196  
150.720  
138.903  
137.557  
136.889  
132.303  
130.849  
130.077  
129.566  
129.330  
128.863  
128.529  
127.214  
123.355  
121.964  
120.092  
115.063

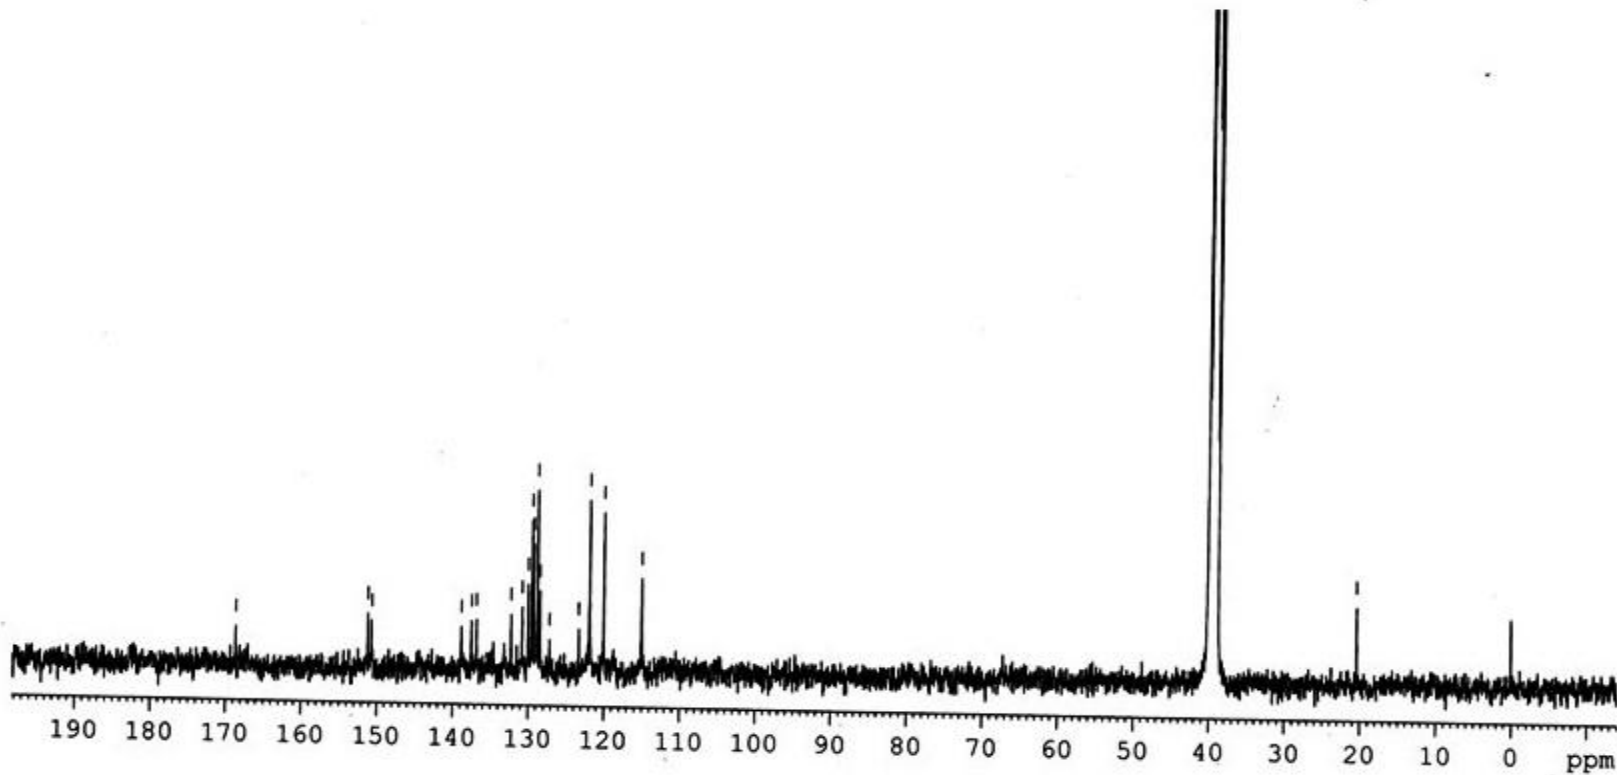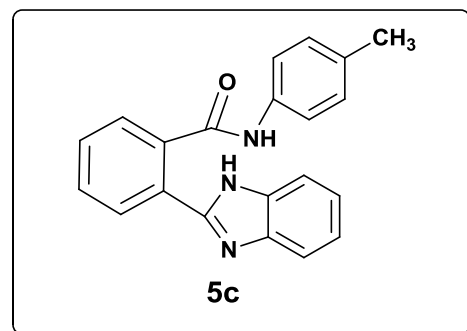

<sup>1</sup>H NMR IN DMSO-D6  
AV 400MHz

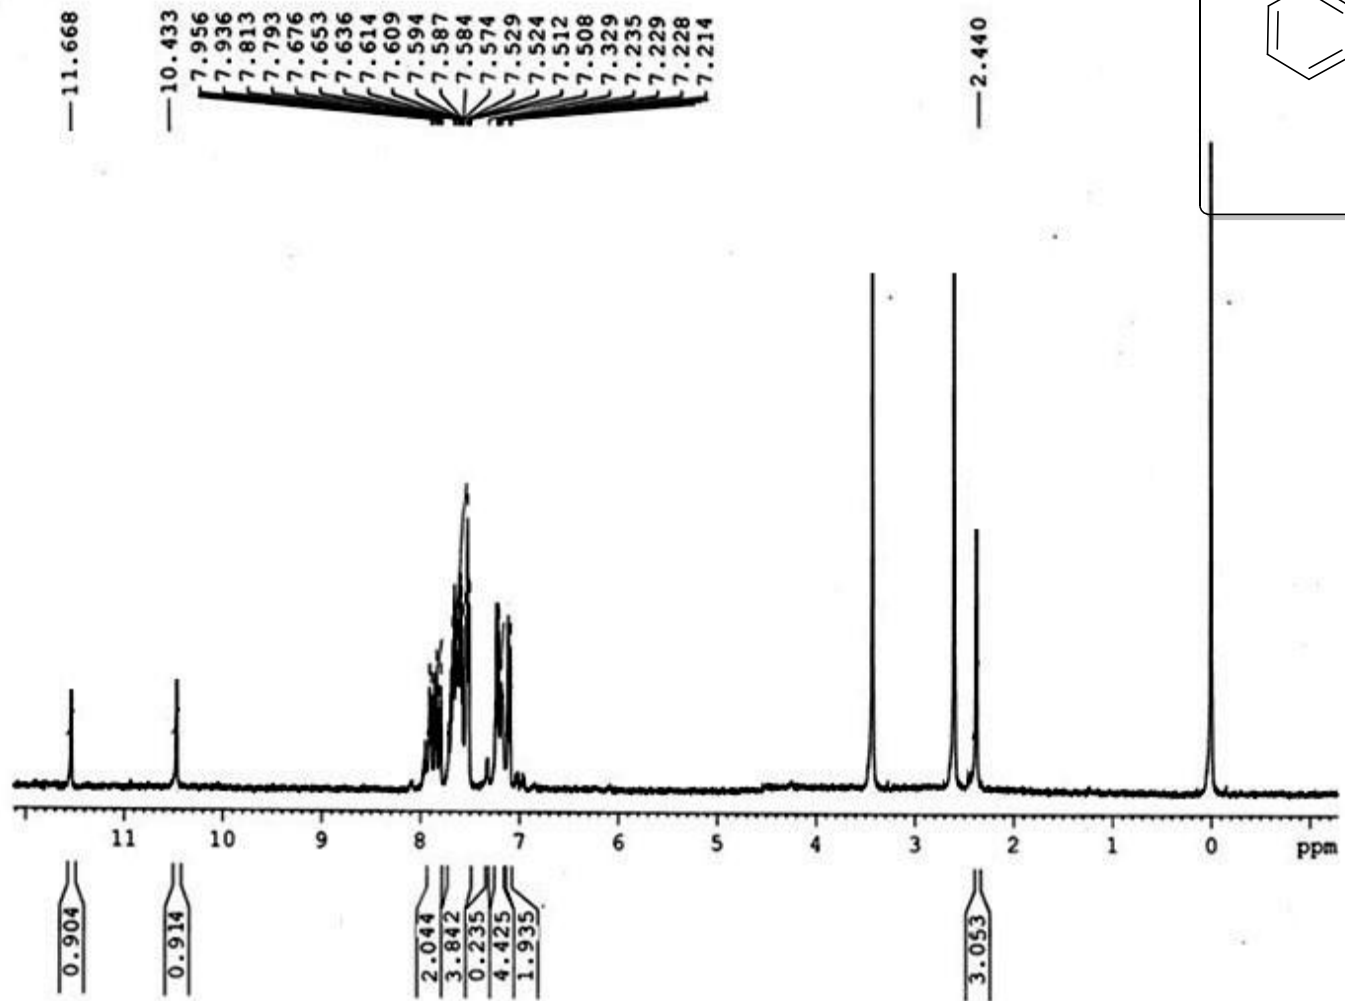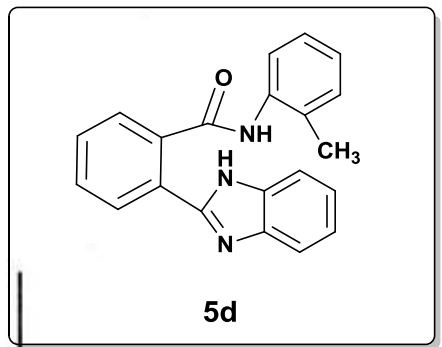



**<sup>13</sup>C NMR IN DMSO-D<sub>6</sub>**  
**AV 400MHz**

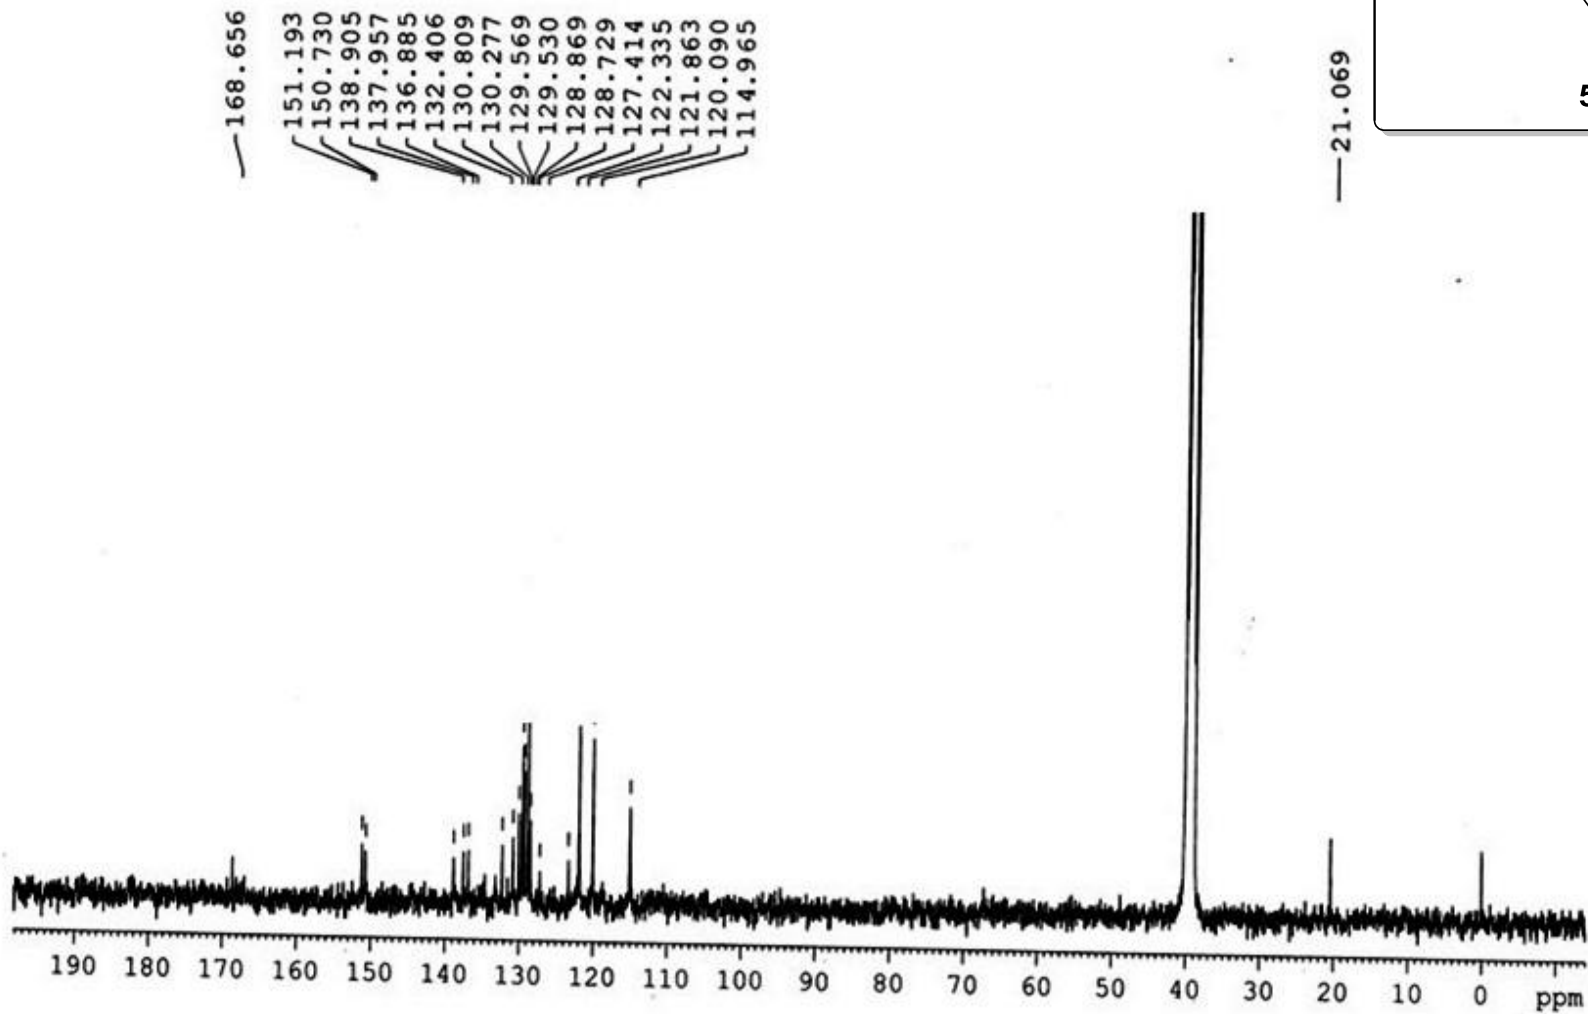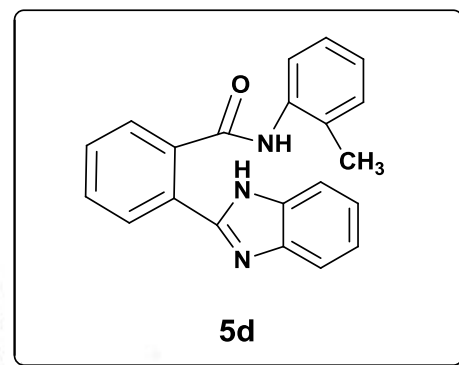

<sup>1</sup>H NMR IN DMSO-D<sub>6</sub>  
AV 400MHz

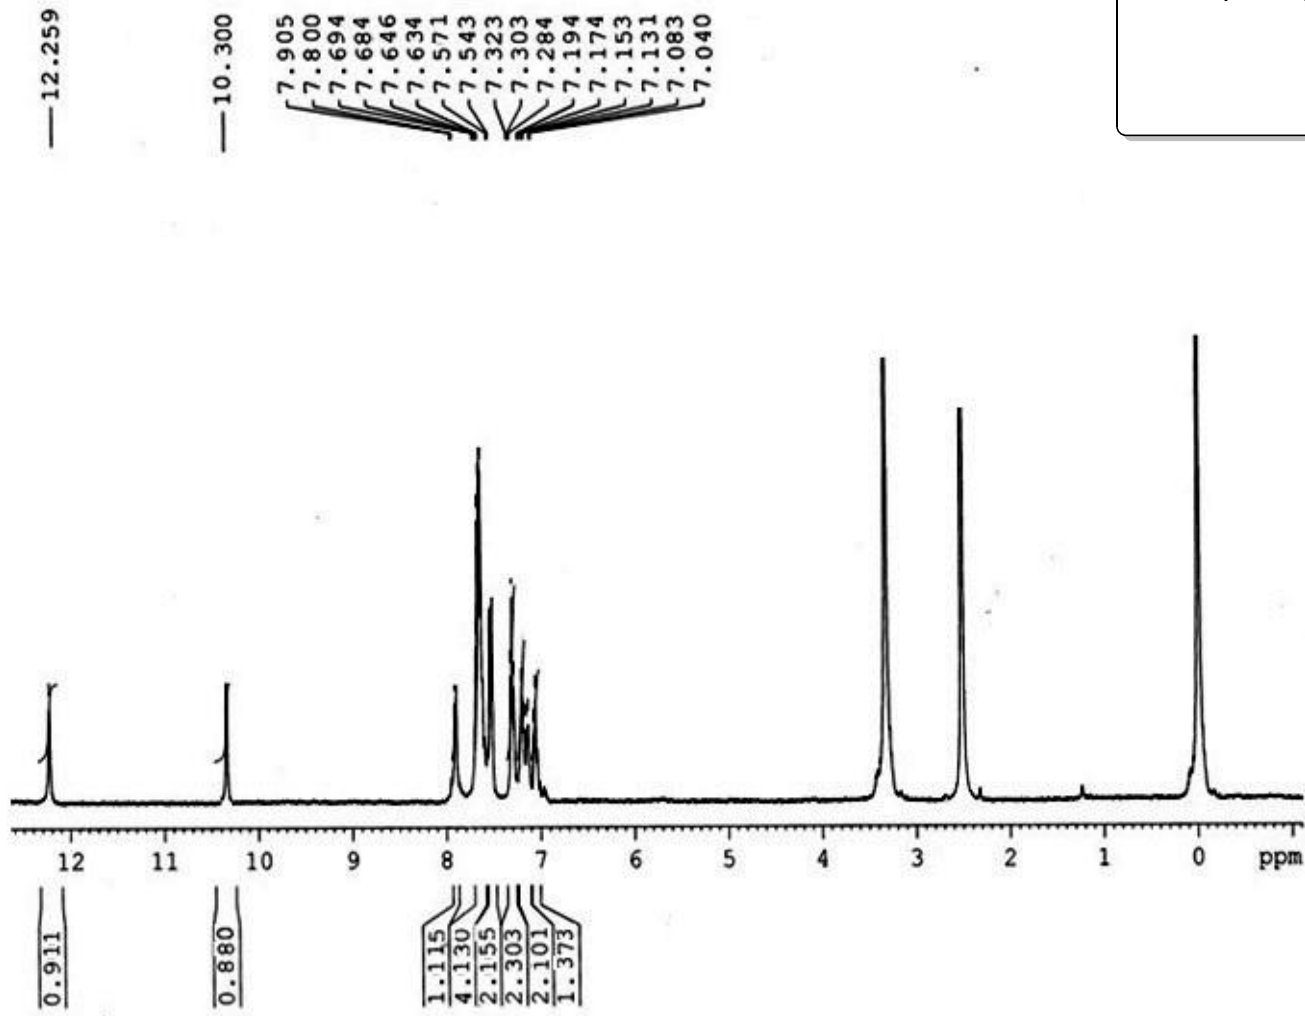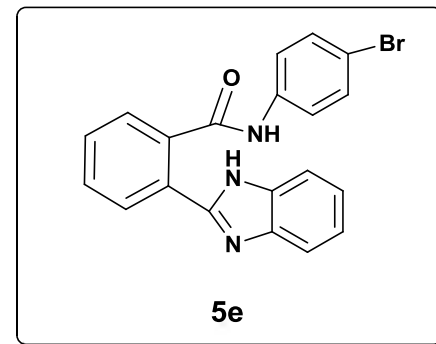

**<sup>13</sup>C NMR IN DMSO-D6**  
AV 400MHz

— 169.756  
151.098  
150.912  
138.607  
137.356  
135.786  
133.290  
130.739  
130.574  
129.166  
129.030  
128.963  
128.528  
127.318  
123.254  
121.865  
121.299  
114.363

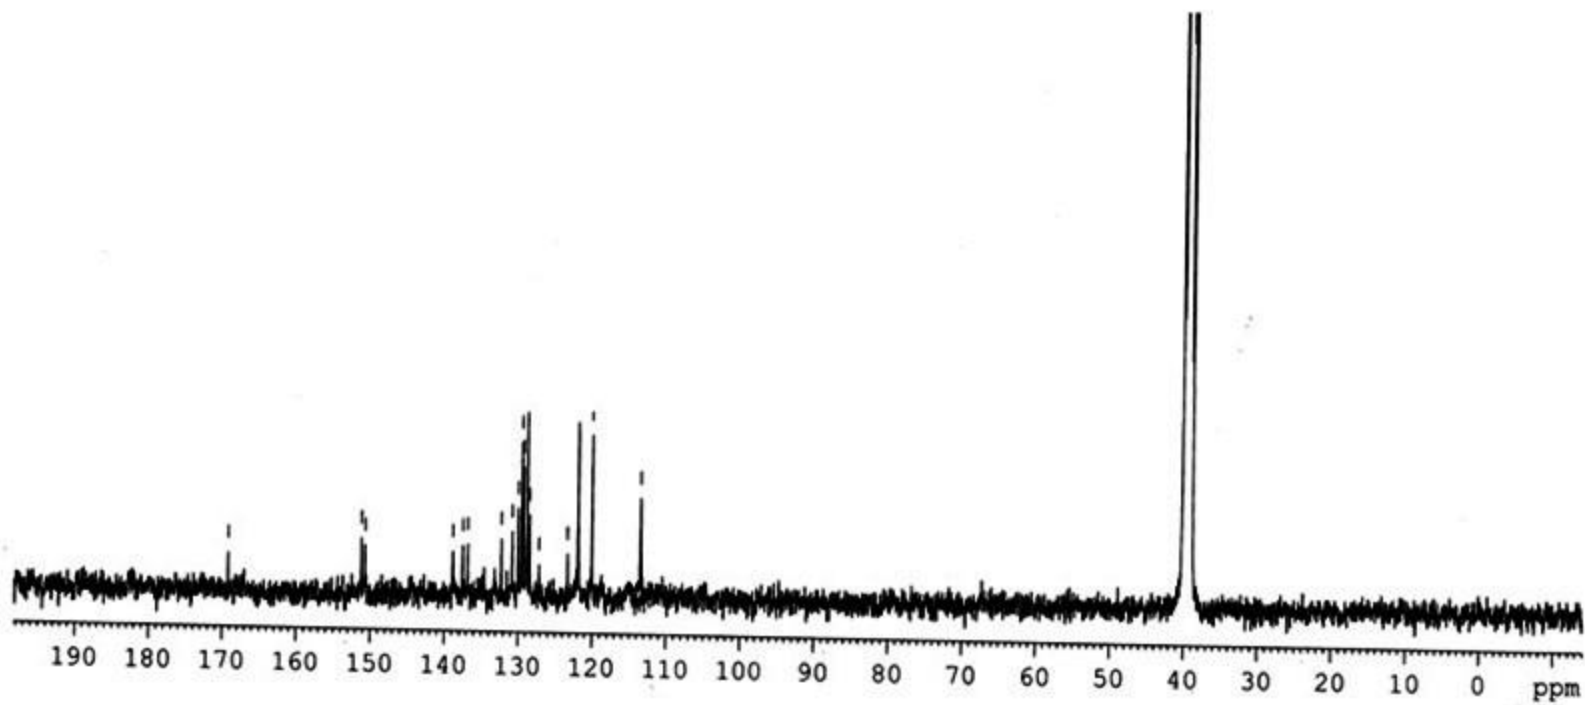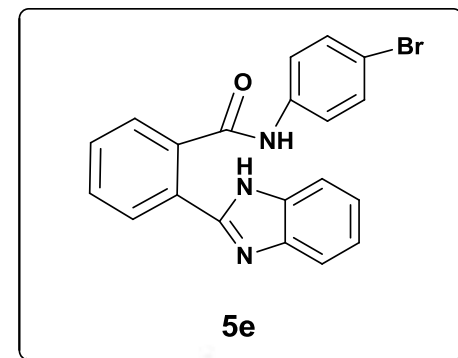

$^1\text{H}$  NMR IN DMSO- $d_6$   
AV 400MHz

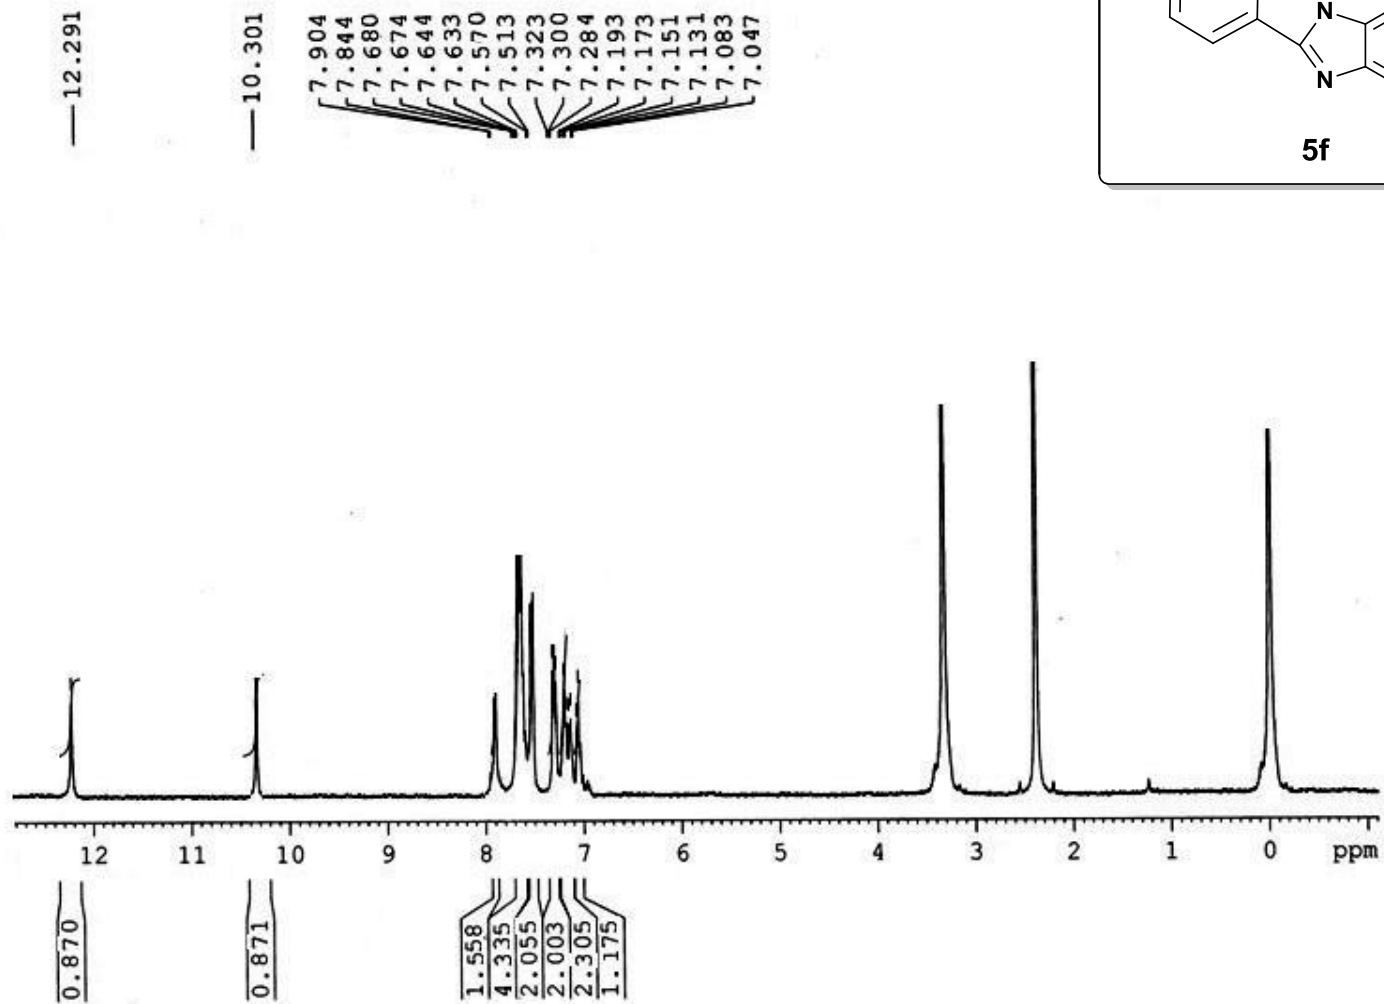

**<sup>13</sup>C NMR IN DMSO-D<sub>6</sub>**  
AV 400MHz

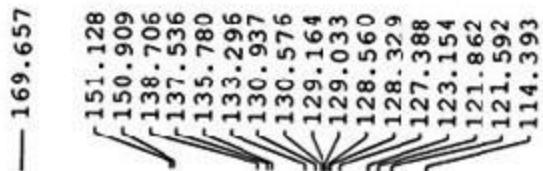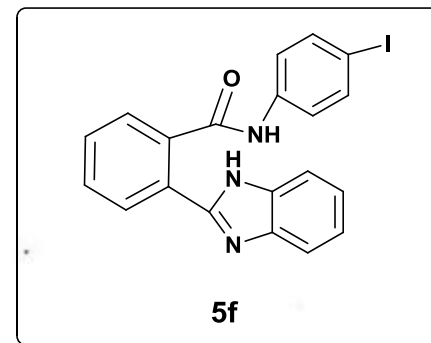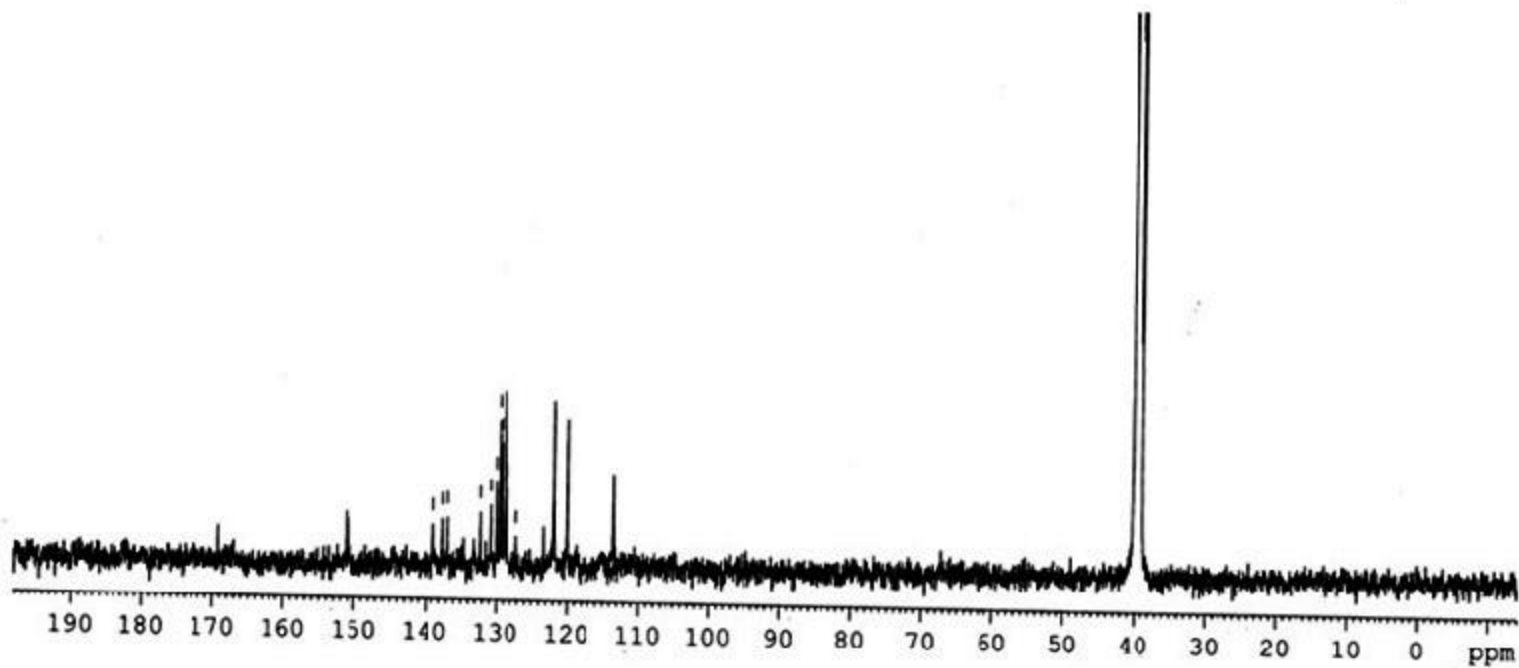

<sup>1</sup>H NMR IN DMSO-D<sub>6</sub>  
AV 400MHz

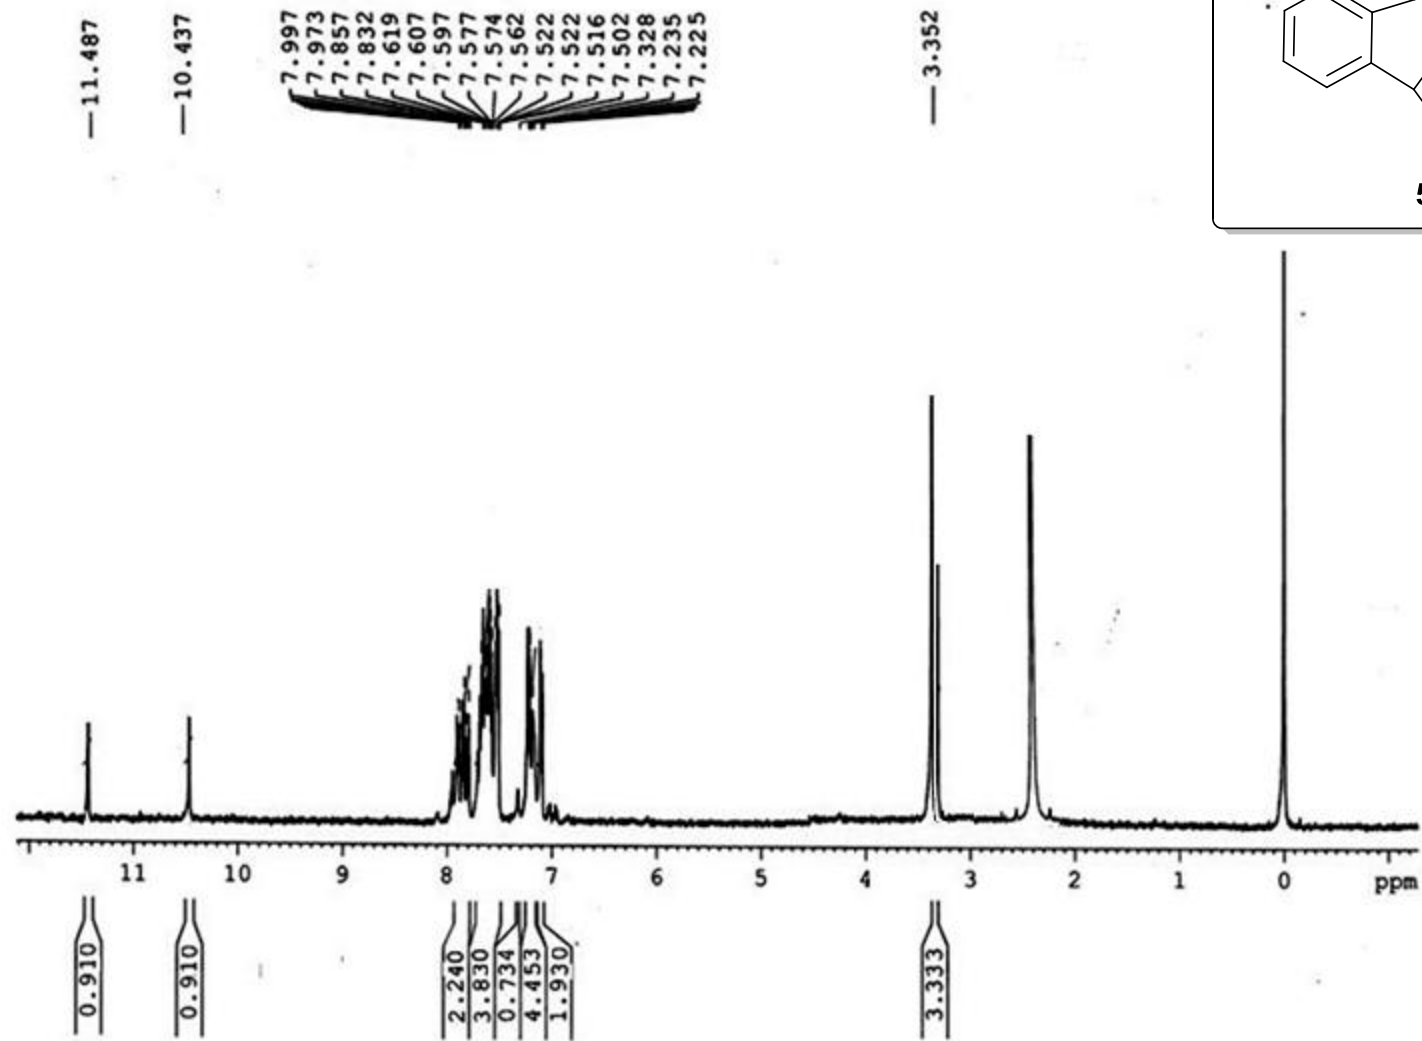

<sup>13</sup>C NMR IN DMSO-D<sub>6</sub>  
AV 400MHz

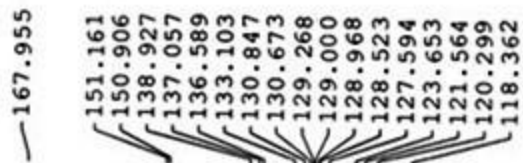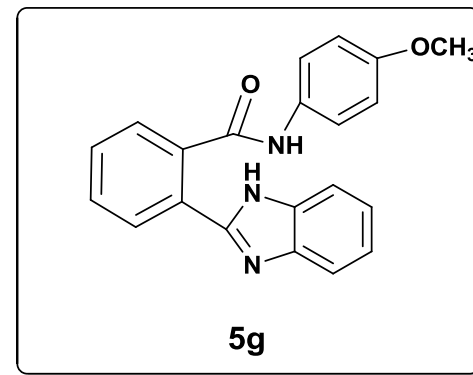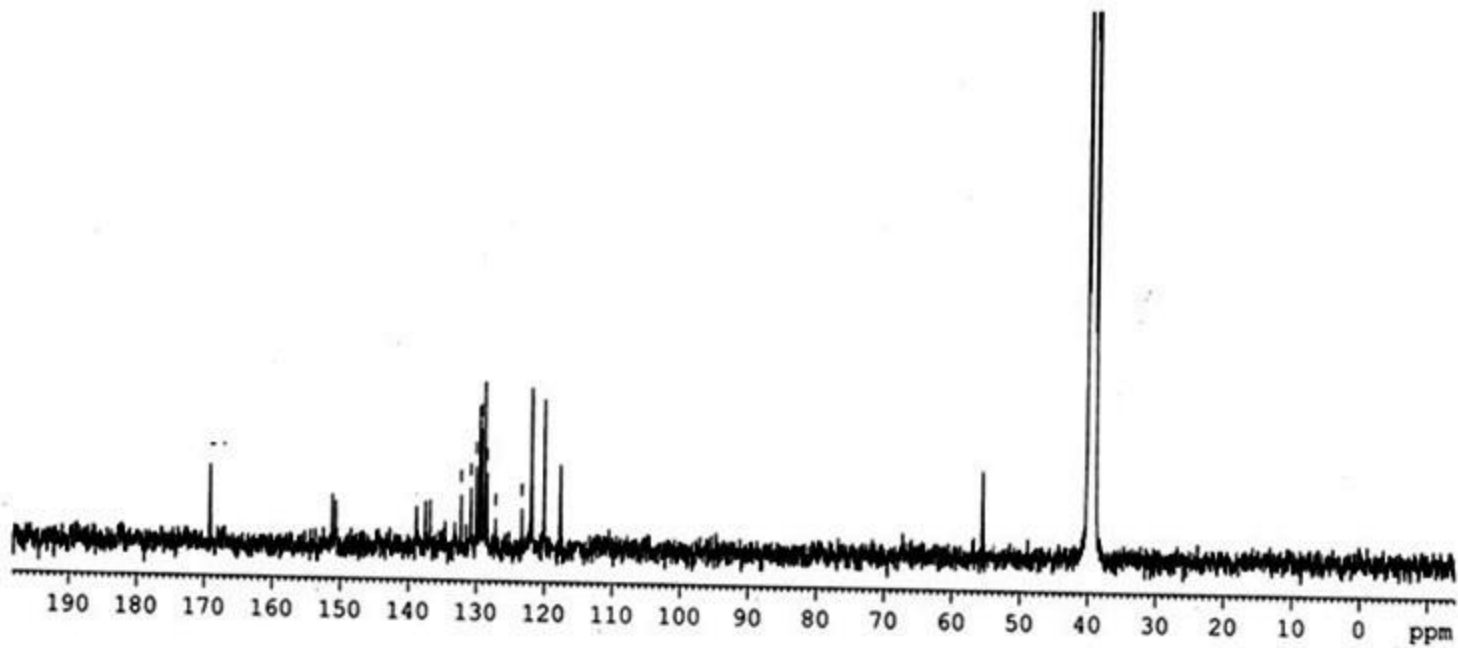

NMR IN DMSO-D6  
AV 400MHz

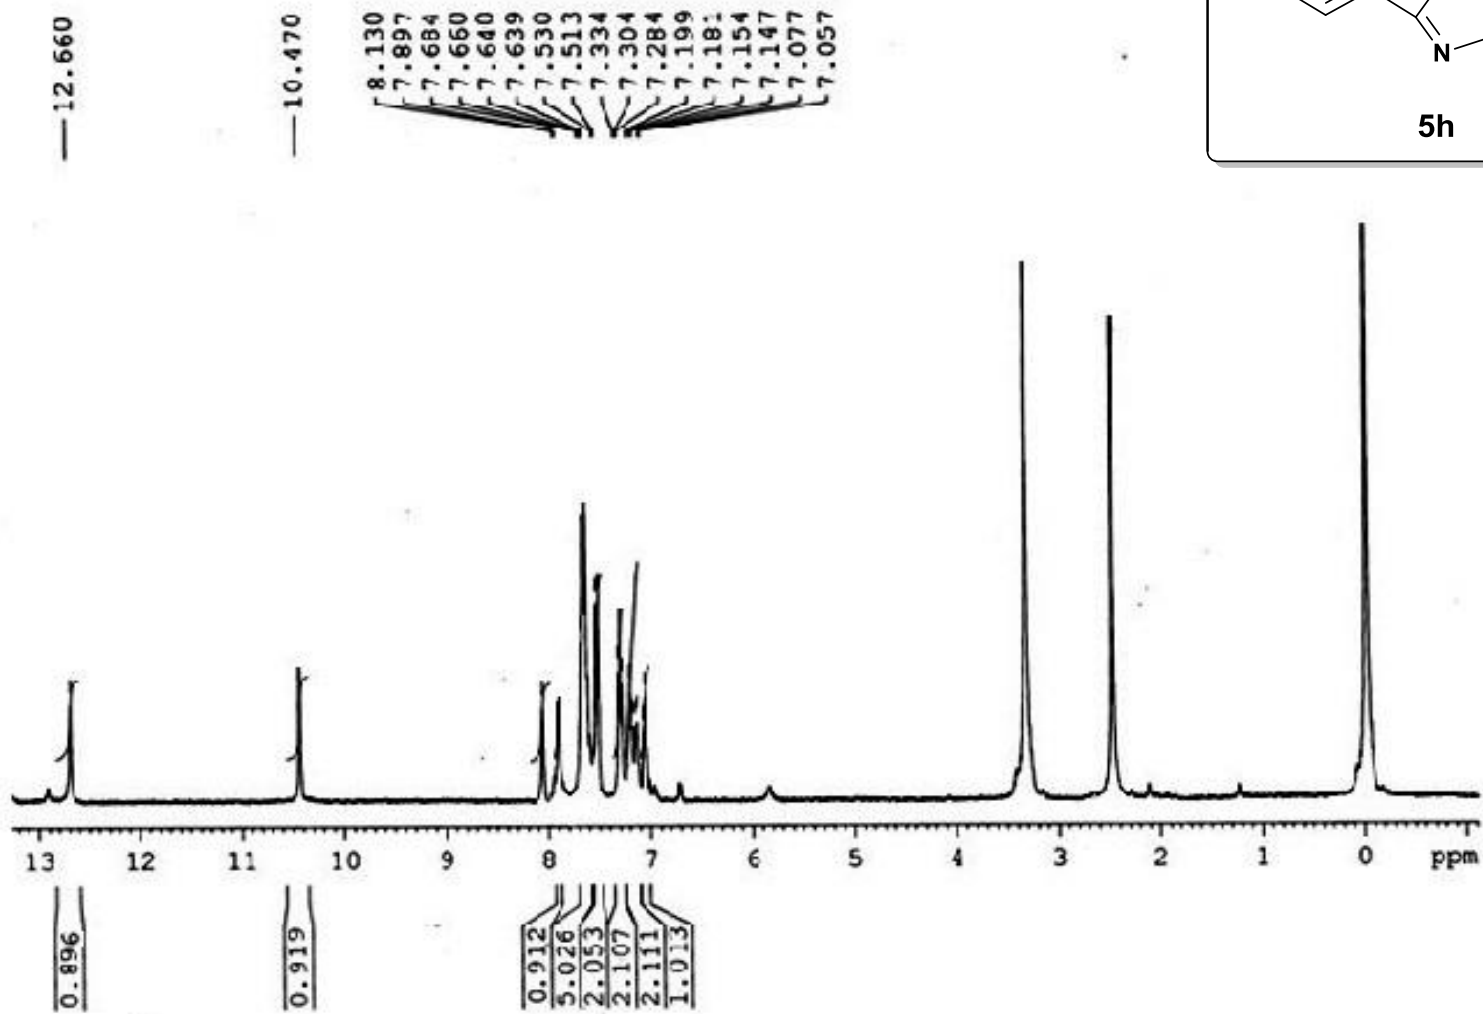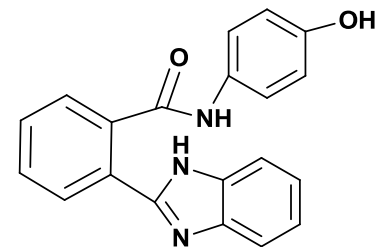

5h



<sup>13</sup>C NMR IN DMSO-D<sub>6</sub>  
AV 400MHz

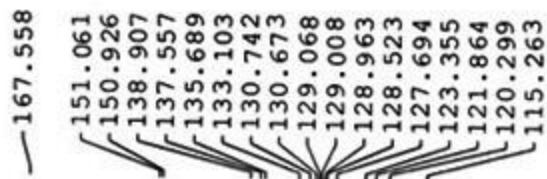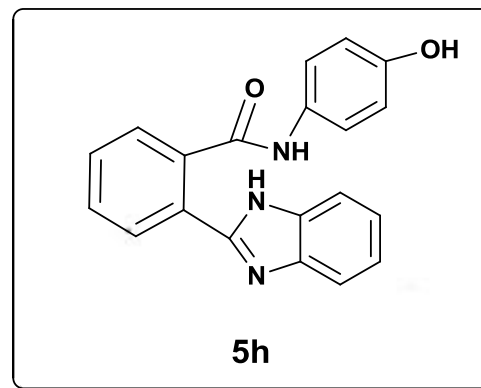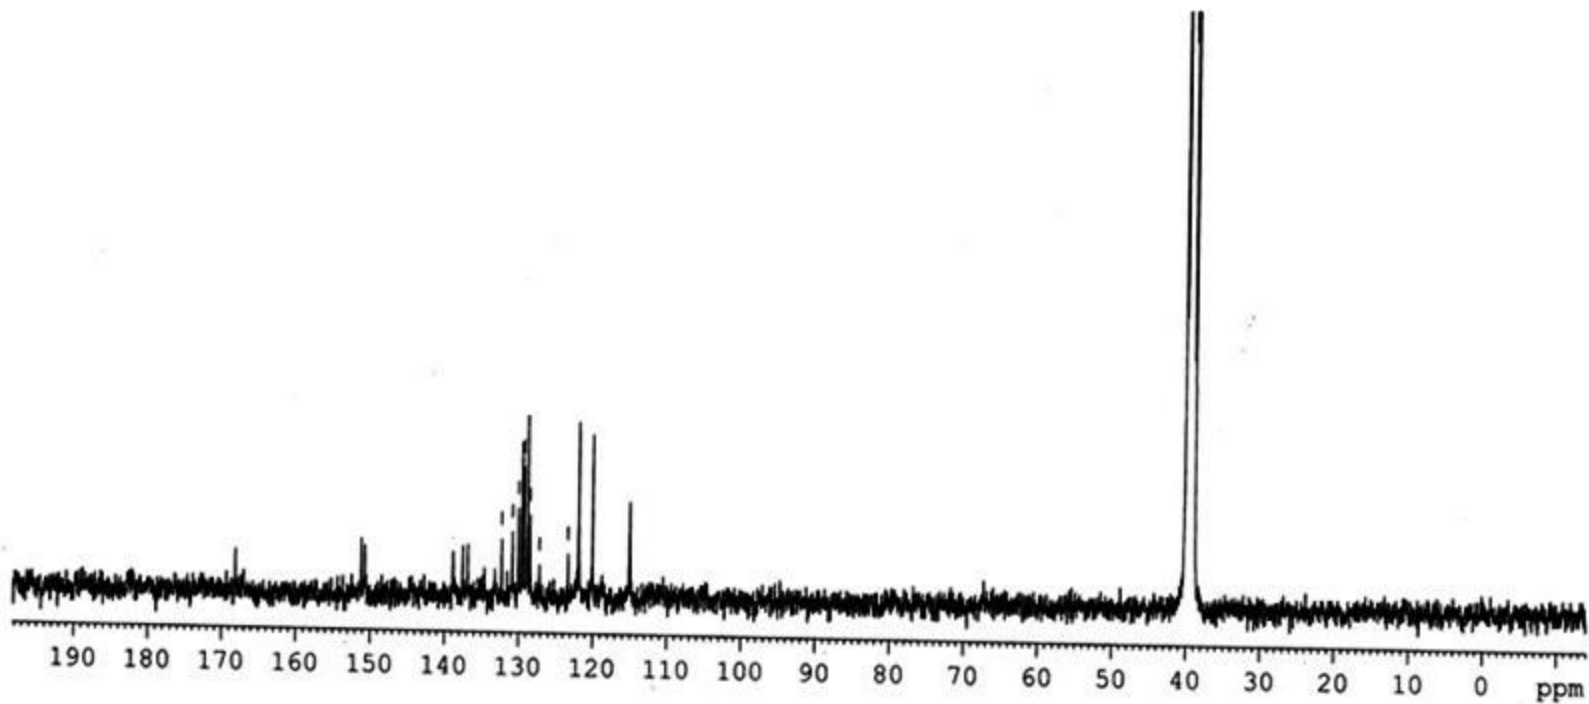

<sup>1</sup>H NMR IN DMSO-D6  
AV 400MHz

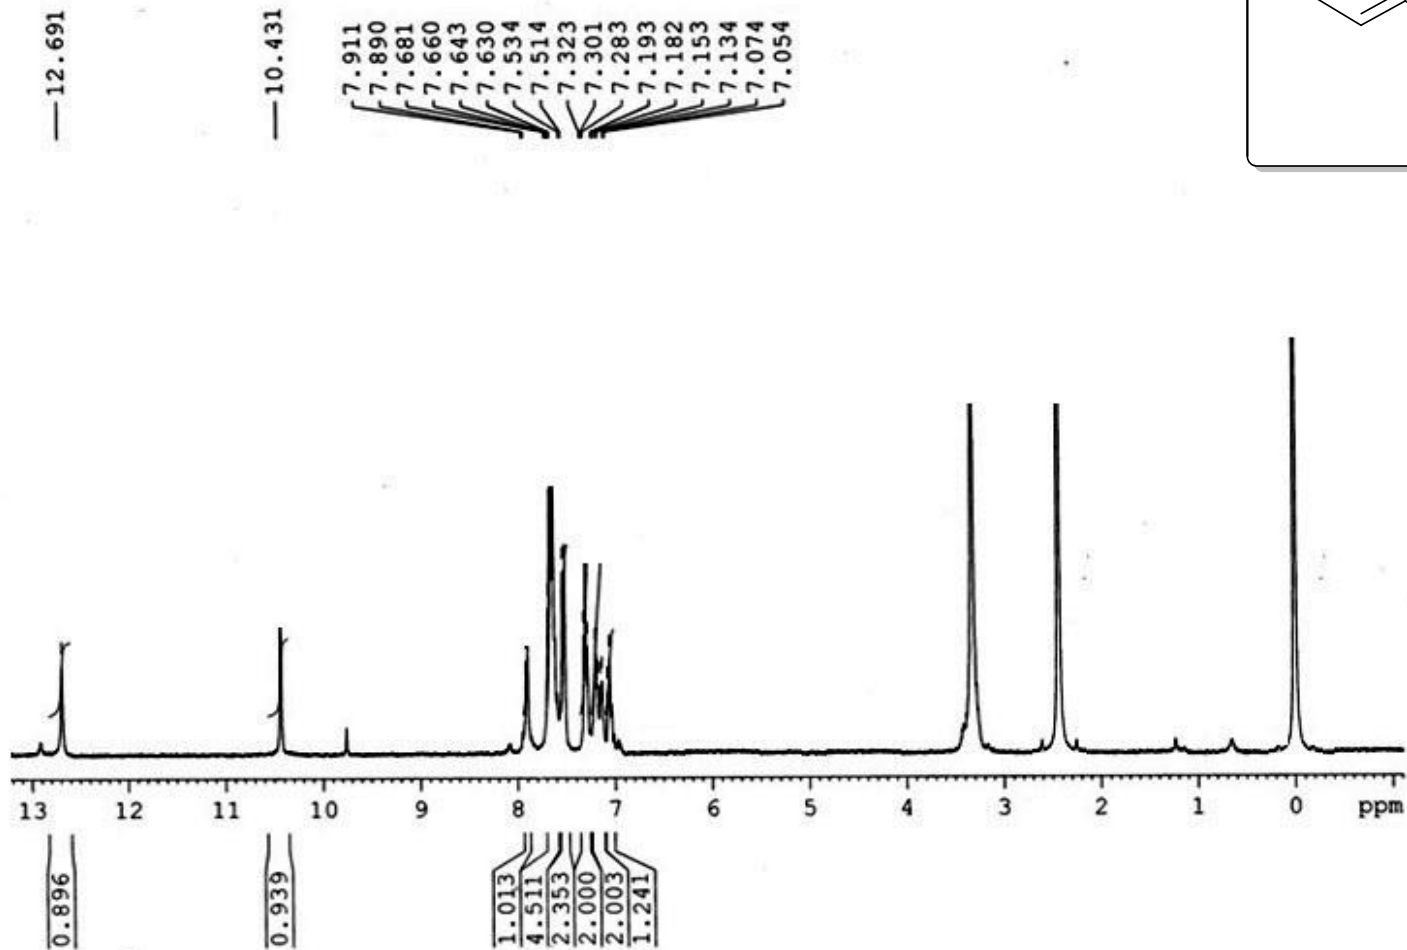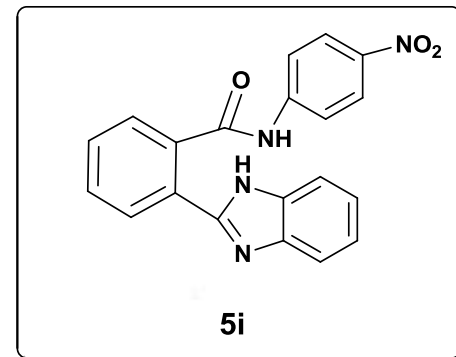

<sup>13</sup>C NMR IN DMSO-D<sub>6</sub>  
AV 400MHz

168.566  
151.293  
150.630  
138.915  
137.907  
136.788  
132.506  
130.504  
130.278  
129.967  
129.539  
128.869  
128.529  
127.414  
122.335  
121.760  
120.098  
114.935

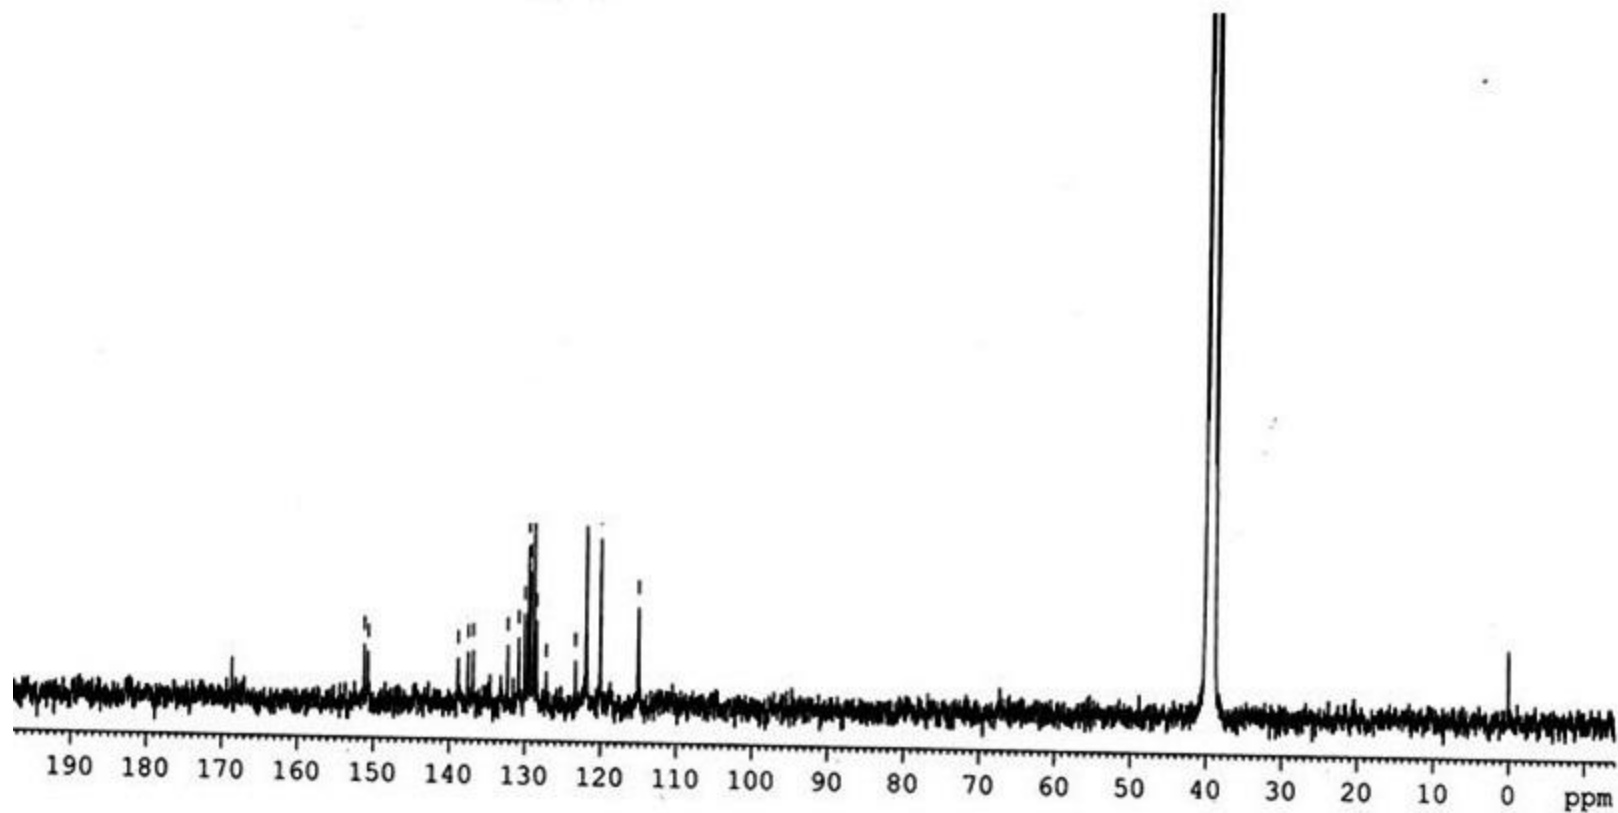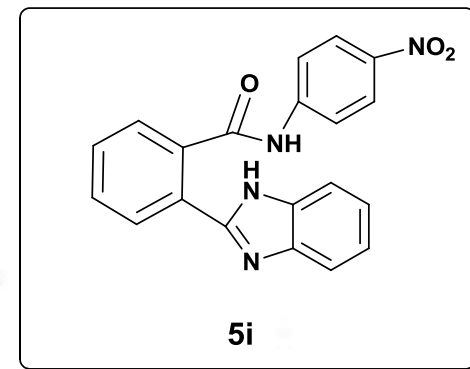

**<sup>1</sup>H NMR IN DMSO-D<sub>6</sub>**  
AV 400MHz

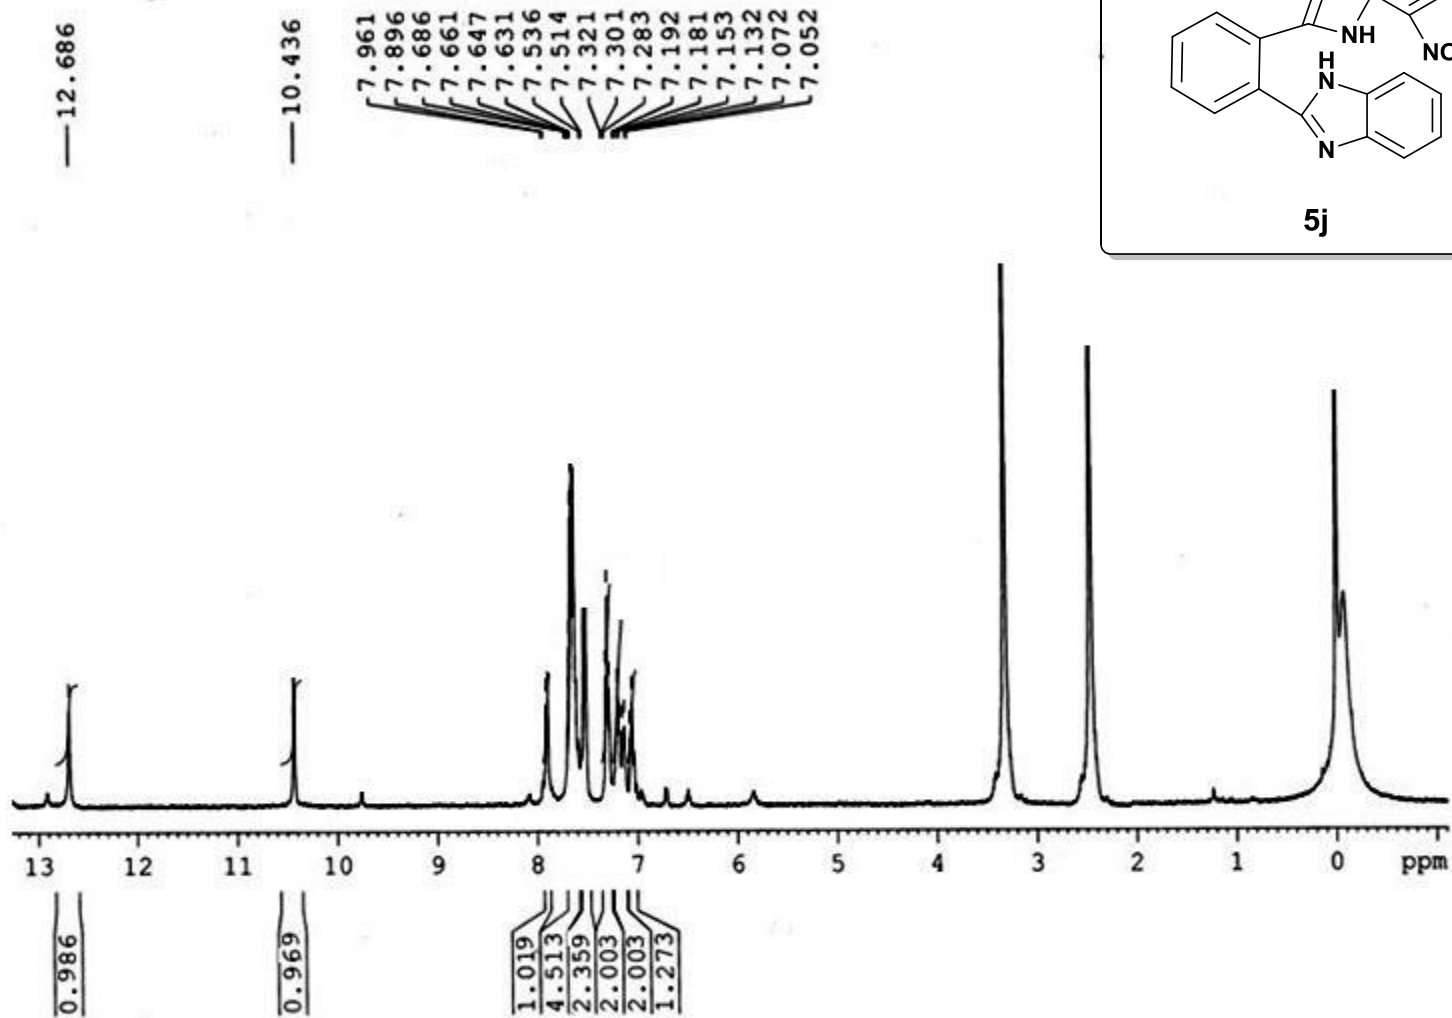

<sup>13</sup>C NMR IN DMSO-D6  
AV 400MHz

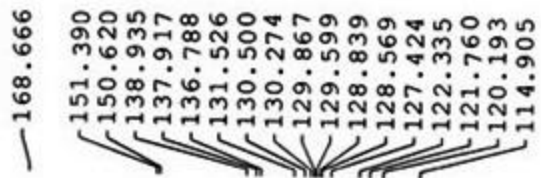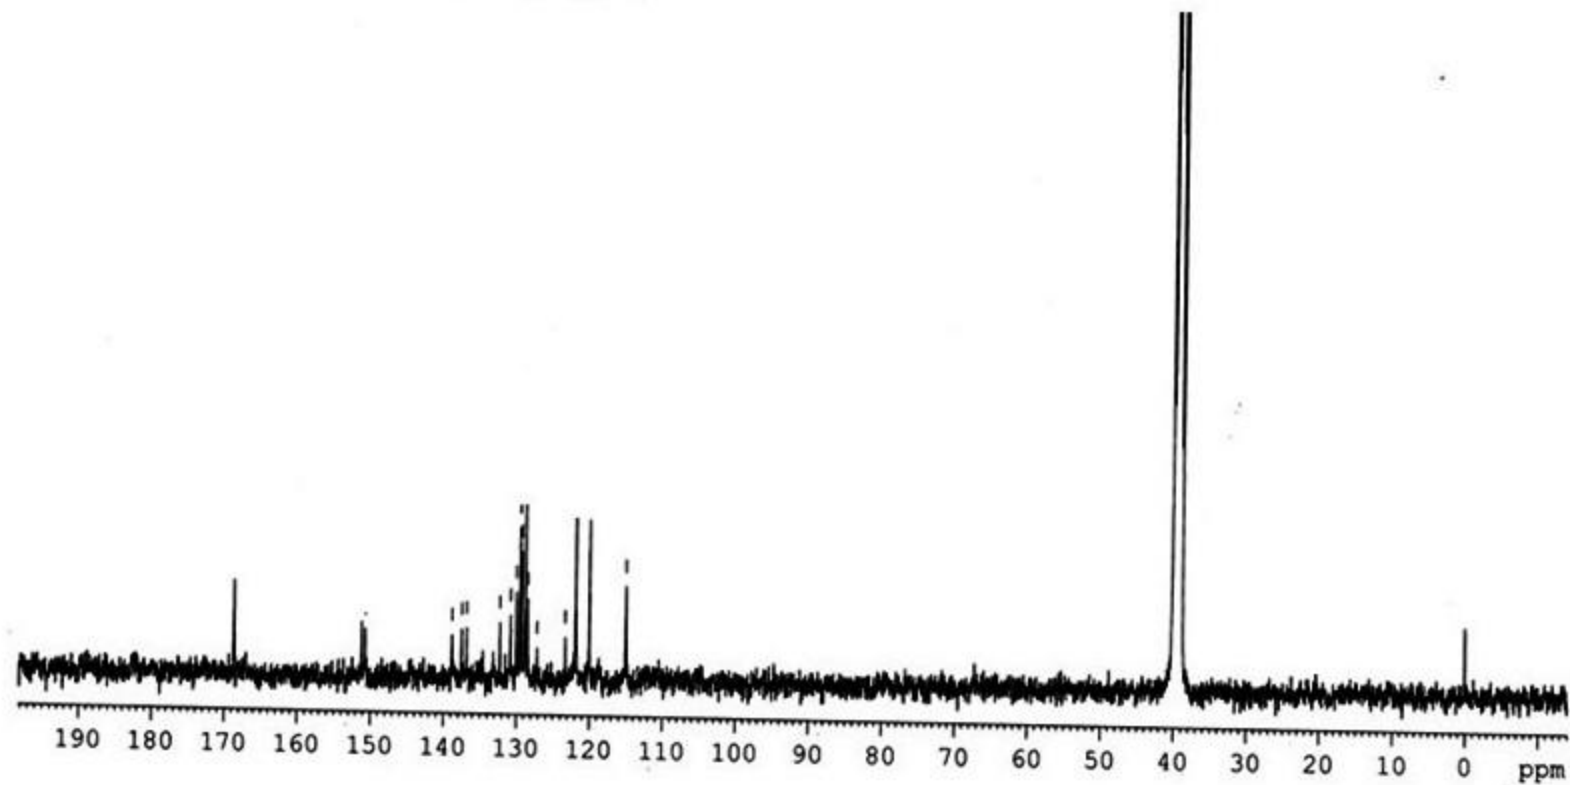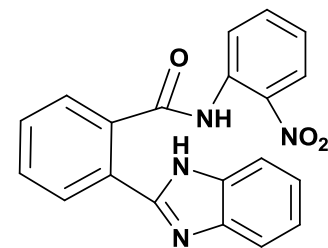

5j

<sup>1</sup>H NMR IN DMSO-D<sub>6</sub>  
AV 400MHz

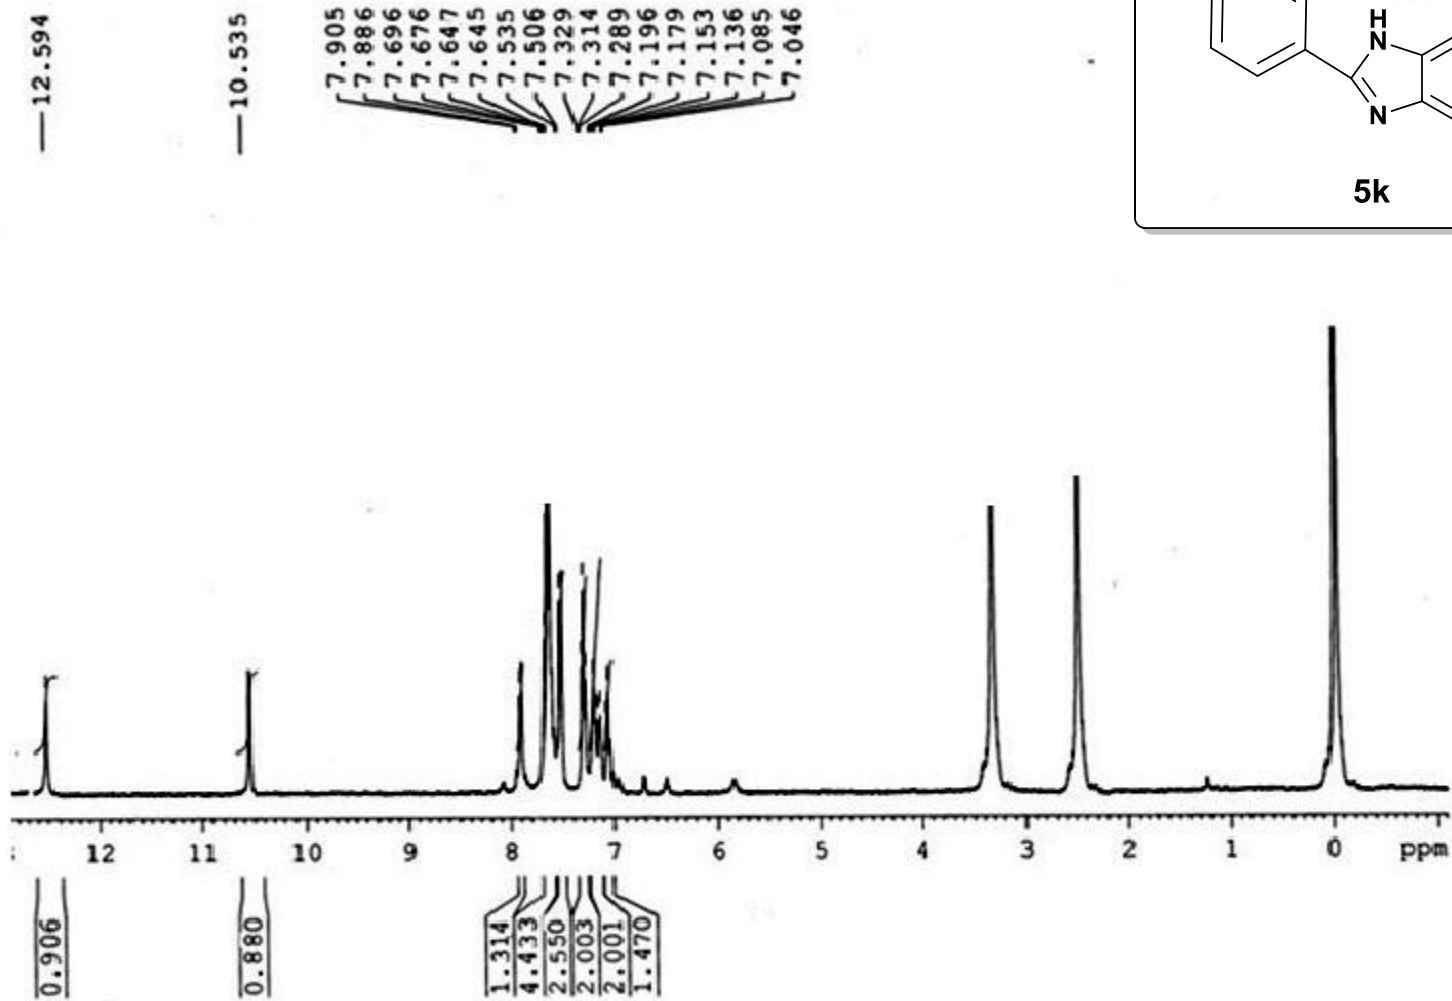

**<sup>13</sup>C NMR IN DMSO-D6  
AV 400MHz**

— 169.810  
152.125  
151.604  
139.000  
138.637  
136.787  
134.195  
131.930  
130.977  
129.967  
129.533  
128.368  
128.025  
127.385  
124.252  
121.963  
121.586  
114.633

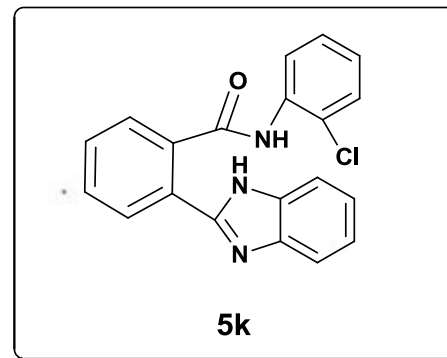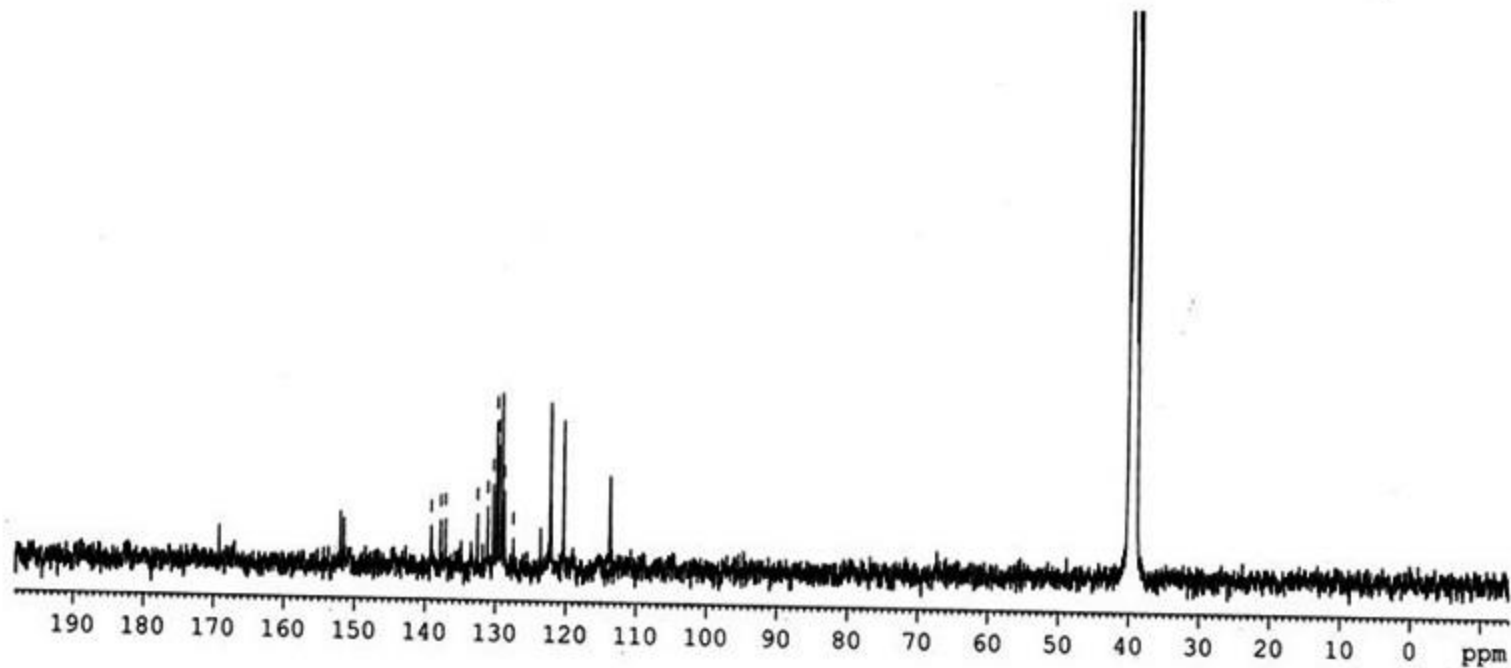

<sup>1</sup>H NMR IN DMSO-D<sub>6</sub>  
AV 400MHz

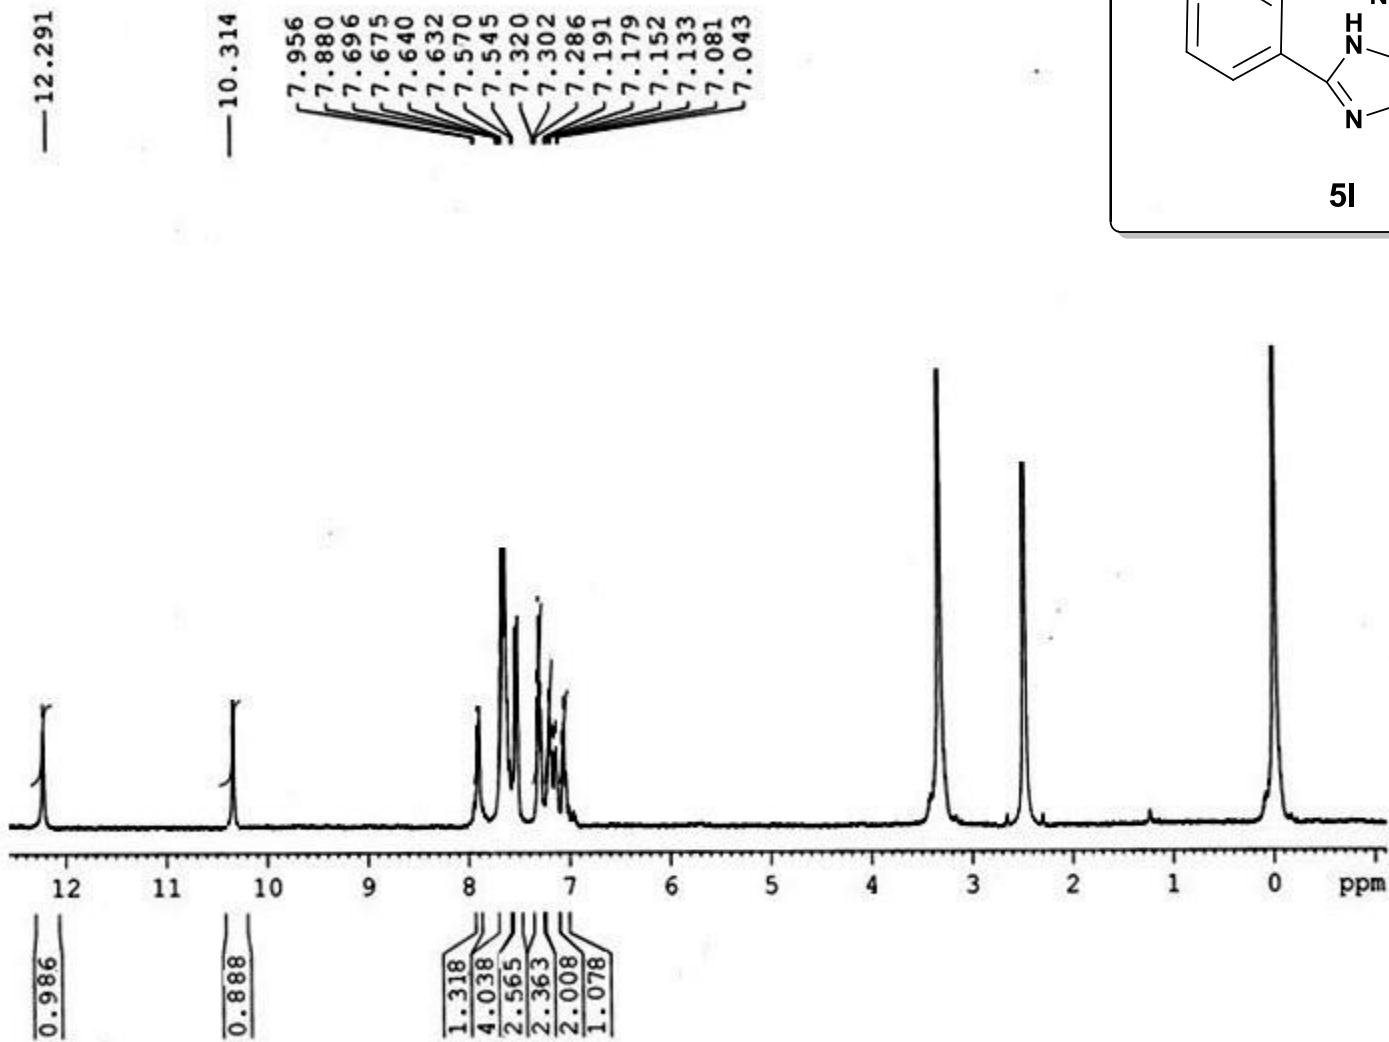



**<sup>13</sup>C NMR IN DMSO-D<sub>6</sub>  
AV 400MHz**

168.617  
151.590  
150.626  
138.707  
137.053  
136.889  
132.353  
130.948  
130.007  
129.569  
129.338  
128.762  
128.529  
127.315  
123.354  
121.962  
120.094  
115.360

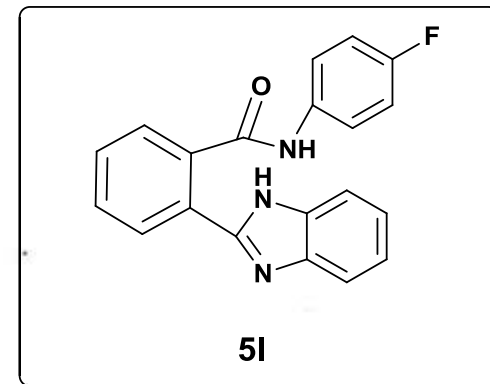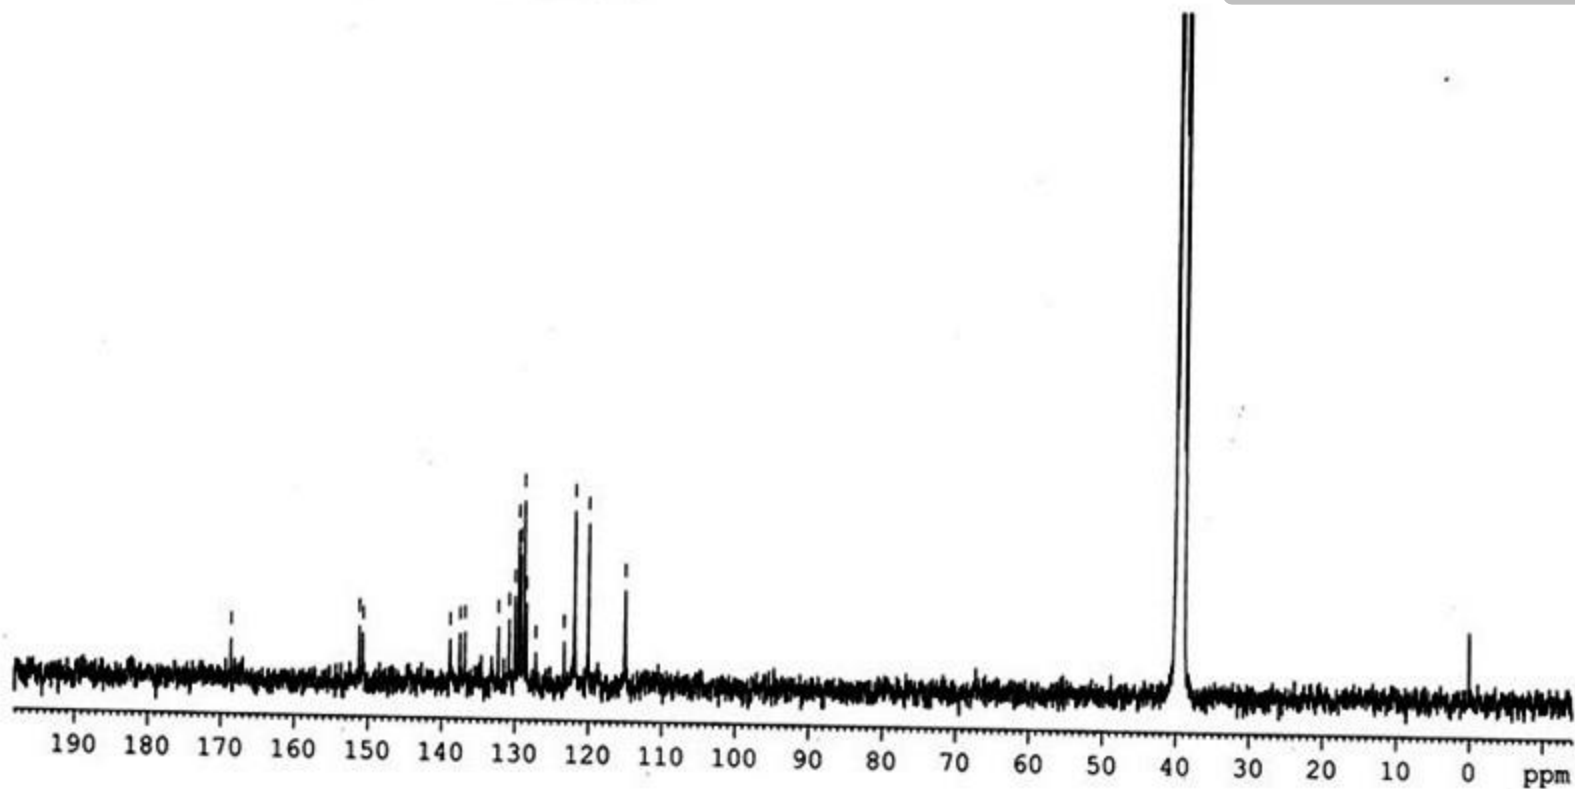

## 2. Tables (3, 4, 5 & 6)

**Table 3** Reaction time and yields of **3a-3l** obtained from **1** & **2a-2l**.

| Entry | Starting Material | Product   | Time (min) | Yield <sup>≠</sup> | M.P (°C) [lit. M.P.°C]                |
|-------|-------------------|-----------|------------|--------------------|---------------------------------------|
| 1     | 2a                | <b>3a</b> | 10         | 91                 | 170-172 [lit., <sup>22</sup> 170-172] |
| 2     | 2b                | <b>3b</b> | 15         | 91                 | 181-182 [lit., <sup>22</sup> 182-184] |
| 3     | 2c                | <b>3c</b> | 10         | 87                 | 155-157 [lit., <sup>22</sup> 156-158] |
| 4     | 2d                | <b>3d</b> | 10         | 88                 | 177-179 [lit., <sup>22</sup> 178-180] |
| 5     | 2e                | <b>3e</b> | 15         | 90                 | 188-190 [lit., <sup>22</sup> 190-192] |
| 6     | 2f                | <b>3f</b> | 10         | 91                 | 180-182 [lit., <sup>23</sup> 179]     |
| 7     | 2g                | <b>3g</b> | 10         | 86                 | 159-161 [lit., <sup>22</sup> 160-162] |
| 8     | 2h                | <b>3h</b> | 15         | 91                 | >250 [lit., <sup>23</sup> 289-290]    |
| 9     | 2i                | <b>3i</b> | 15         | 90                 | 190-192 [lit., <sup>23</sup> 192-193] |
| 10    | 2j                | <b>3j</b> | 15         | 87                 | 238-240 [lit., <sup>21</sup> 238-240] |
| 11    | 2k                | <b>3k</b> | 15         | 83                 | 142-144 [lit., <sup>23</sup> 142]     |
| 12    | 2l                | <b>3l</b> | 15         | 86                 | 153-155 [lit., <sup>21</sup> 155]     |

<sup>≠</sup> Refers to yields of crude products only.

**Table 4** Reaction time and yields of **5a-5l** obtained from **3a-3l** & **4** via step wise fashion in water.

| Entry | Starting Materials |   | Product   | Time (min) | Yield <sup>≠</sup> |
|-------|--------------------|---|-----------|------------|--------------------|
| 1     | 3a                 | 4 | <b>5a</b> | 90         | 88                 |
| 2     | 3b                 | 4 | <b>5b</b> | 100        | 85                 |
| 3     | 3c                 | 4 | <b>5c</b> | 100        | 84                 |
| 4     | 3d                 | 4 | <b>5d</b> | 120        | 78                 |
| 5     | 3e                 | 4 | <b>5e</b> | 100        | 82                 |
| 6     | 3f                 | 4 | <b>5f</b> | 90         | 84                 |
| 7     | 3g                 | 4 | <b>5g</b> | 100        | 76                 |
| 8     | 3h                 | 4 | <b>5h</b> | 100        | 82                 |
| 9     | 3i                 | 4 | <b>5i</b> | 120        | 82                 |
| 10    | 3j                 | 4 | <b>5j</b> | 120        | 79                 |
| 11    | 3k                 | 4 | <b>5k</b> | 120        | 82                 |
| 12    | 3l                 | 4 | <b>5l</b> | 120        | 78                 |

<sup>≠</sup> Refers to yields of crude products only.

**Table 5** Reaction time and yields of **5a-5l** obtained from **7** & **2a-2l** via step wise fashion in water.

| Entry | Starting Materials |    | Product   | Time (min) | Yield <sup>≠</sup> |
|-------|--------------------|----|-----------|------------|--------------------|
| 1     | 7                  | 2a | <b>5a</b> | 90         | 84                 |
| 2     | 7                  | 2b | <b>5b</b> | 90         | 78                 |
| 3     | 7                  | 2c | <b>5c</b> | 90         | 79                 |
| 4     | 7                  | 2d | <b>5d</b> | 90         | 78                 |
| 5     | 7                  | 2e | <b>5e</b> | 90         | 83                 |
| 6     | 7                  | 2f | <b>5f</b> | 90         | 77                 |
| 7     | 7                  | 2g | <b>5g</b> | 90         | 78                 |
| 8     | 7                  | 2h | <b>5h</b> | 90         | 83                 |
| 9     | 7                  | 2i | <b>5i</b> | 120        | 84                 |
| 10    | 7                  | 2j | <b>5j</b> | 120        | 78                 |
| 11    | 7                  | 2k | <b>5k</b> | 120        | 85                 |
| 12    | 7                  | 2l | <b>5l</b> | 120        | 84                 |

<sup>≠</sup> Refers to yields of crude products only

| Entry | Prproduct | Time (min) <sup>a</sup> | Yield <sup>b,≠</sup> | Time <sup>b</sup> (min) | Yield <sup>b,≠</sup> | Time <sup>c</sup> (min) | Yield <sup>c,≠</sup> |
|-------|-----------|-------------------------|----------------------|-------------------------|----------------------|-------------------------|----------------------|
| 1     | <b>5a</b> | 60                      | 88                   | 90                      | 87                   | 120                     | 88                   |
| 2     | <b>5b</b> | 60                      | 88                   | 90                      | 87                   | 120                     | 87                   |
| 3     | <b>5c</b> | 60                      | 88                   | 120                     | 86                   | 150                     | 86                   |
| 4     | <b>5d</b> | 60                      | 89                   | 120                     | 88                   | 150                     | 82                   |
| 5     | <b>5e</b> | 70                      | 88                   | 90                      | 89                   | 150                     | 82                   |
| 6     | <b>5f</b> | 60                      | 92                   | 90                      | 88                   | 120                     | 86                   |
| 7     | <b>5g</b> | 65                      | 89                   | 90                      | 89                   | 120                     | 87                   |
| 8     | <b>5h</b> | 70                      | 87                   | 90                      | 87                   | 120                     | 85                   |
| 9     | <b>5i</b> | 85                      | 87                   | 120                     | 84                   | 150                     | 83                   |
| 10    | <b>5j</b> | 90                      | 88                   | 120                     | 85                   | 150                     | 82                   |
| 11    | <b>5k</b> | 80                      | 89                   | 120                     | 85                   | 150                     | 84                   |
| 12    | <b>5l</b> | 90                      | 89                   | 120                     | 85                   | 150                     | 82                   |

a) One-pot synthesis from 1, 2 & 4 b) Tandem reaction from (**1+2 →3 →4→5**) c) Tandem reaction from (**1+4 →7 →2→ 5**)

≠ Refers to yields of crude products only.
